# Supplementary material for: Computational studies on Mn(iii)-catalyzed cyclopropanols: a case of Mn(iii)-based metalloradical catalysis involving an α-Mn(ii)-bound-alkyl radical key intermediate
Source: Royal Society of Chemistry journal article supplement (doi:10.1039/d4qo01775g), 2024-12-11
Supplement: d4qo01775g1.pdf [file d4qo01775g1.pdf]

## ***Supporting Information***

### **Computational Studies on Mn(III)-Catalyzed Cyclopropanols: A Case of Mn(III)-Based Metalloradical Catalysis Involving $\alpha$ -Mn(II)-Bound-Alkyl Radical Key Intermediate**

Pan Hong,<sup>b</sup> Xiu-Yuan Zou,<sup>a</sup> Peng-Cheng Zhang,<sup>d</sup> Xin Lu,<sup>b</sup> Long-Wu Ye,<sup>b</sup> Yi-Dong Luo<sup>c</sup> and Qing Sun<sup>\*,a,c</sup>

*<sup>a</sup>Key Laboratory of Jiangxi Province for Persistent Pollutants Prevention Control and Resource Reuse, Nanchang Hangkong University, Nanchang 330063, China*

*<sup>b</sup>State Key Laboratory of Physical Chemistry of Solid Surface, Fujian Provincial Key Laboratory for Theoretical and Computational Chemistry, Department of Chemistry, College of Chemistry and Chemical Engineering, Xiamen University, Xiamen 361005, China*

*<sup>c</sup>Foshan (Southern China) Institute for New Materials, Foshan 528200, China*

*<sup>d</sup>College of Chemistry and Chemical Engineering, Zhoukou Normal University, Zhoukou 466001, China*

**\*Correspondence:** [sunqing@nchu.edu.cn](mailto:sunqing@nchu.edu.cn)

## Relative Gibbs free energies of $\text{Mn}^{\text{II}}(\text{acac})_2$ , **B**, **B1** and **B2** with different functionals

|                                                     |                                                                                                               |                                                                                                                                |                                                                                                                                  |
|-----------------------------------------------------|---------------------------------------------------------------------------------------------------------------|--------------------------------------------------------------------------------------------------------------------------------|----------------------------------------------------------------------------------------------------------------------------------|
|                                                     | 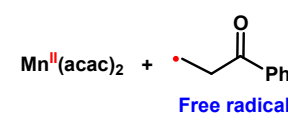<br>Free radical<br><b>B</b> | <br>Mn(II)-bound carbon radical<br><b>B1</b> | <br>Mn(II)-bound carbene radical<br><b>B2</b> |
| SMD-M06-D3/def2-TZVP//<br>SMD-M06/6-31G(d,p)/SDD    | 0.0                                                                                                           | 3.5                                                                                                                            | -3.9                                                                                                                             |
| SMD-PWPB95-D3/def2-TZVP//<br>SMD-M06/6-31G(d,p)/SDD | 0.0                                                                                                           | 5.5                                                                                                                            | -6.6                                                                                                                             |

**Figure S1.** Relative Gibbs free energies (in kcal/mol) of the lowest-lying electronic structures of  $\text{Mn}^{\text{II}}(\text{acac})_2$ , **B**, **B1** and **B2** at SMD-M06-D3/def2-TZVP//SMD-M06/6-31G(d,p)/SDD and SMD-PWPB95-D3/def2-TZVP//SMD-M06/6-31G(d,p)/SDD level with MeOH solvent.

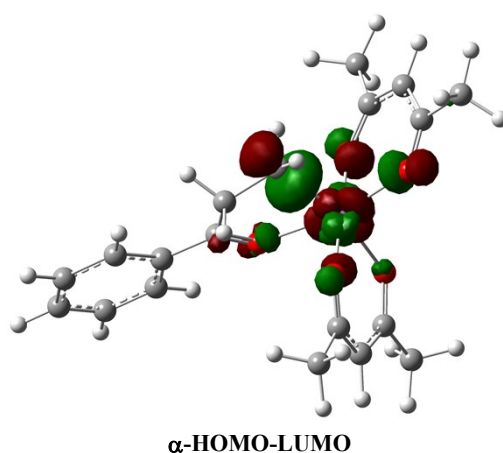

**Figure S2.** Molecular orbital analysis of intermediate **B2**. From the molecular orbital analysis of intermediate **B2**, the bond between the Mn(II) center and alkyl radical's carbon is a dative bond. This bond primarily arises from the weak coordinating interaction between the d orbitals of Mn(II) and the p orbitals of the carbon radical.

## XYZ Coordinates

### 1a

|   |             |             |             |
|---|-------------|-------------|-------------|
| C | -2.25573200 | -0.76133000 | 0.80179500  |
| C | -2.27435400 | -0.83862300 | -0.69463200 |
| C | -1.42519900 | 0.19205300  | -0.00251900 |
| H | -3.12647200 | -0.33351700 | 1.29360200  |
| H | -1.73746900 | -1.53751600 | 1.36105900  |
| H | -3.15663000 | -0.45449100 | -1.20167500 |
| H | -1.78153900 | -1.67419800 | -1.18759200 |
| O | -1.92503200 | 1.50001700  | -0.00440000 |
| H | -1.77462000 | 1.87553600  | -0.88303600 |
| C | 0.06188700  | 0.06959100  | -0.00350700 |
| C | 0.69349800  | -1.18019000 | -0.04272500 |
| C | 0.86020100  | 1.21532700  | 0.04291400  |
| C | 2.07977700  | -1.27661300 | -0.03970600 |

|   |            |             |             |
|---|------------|-------------|-------------|
| H | 0.10098900 | -2.09369700 | -0.07454300 |
| C | 2.24940800 | 1.11775700  | 0.04316400  |
| H | 0.38608500 | 2.19297500  | 0.08491400  |
| C | 2.86697400 | -0.12742800 | 0.00095600  |
| H | 2.54870100 | -2.25825100 | -0.07133400 |
| H | 2.85031200 | 2.02459900  | 0.07845700  |
| H | 3.95213500 | -0.20484500 | 0.00092000  |

**2a**

|   |             |             |             |
|---|-------------|-------------|-------------|
| C | -1.45799600 | 1.69204400  | 0.33518700  |
| H | -2.53055000 | 1.87271800  | 0.33752800  |
| C | -0.93860200 | 0.48814100  | 0.06451900  |
| C | 0.50165700  | 0.17362500  | 0.01966200  |
| C | 1.44591000  | 1.18941300  | -0.17720900 |
| C | 0.95225400  | -1.14204900 | 0.17592700  |
| C | 2.80328500  | 0.89839800  | -0.19344300 |
| H | 1.11501800  | 2.21312400  | -0.34021900 |
| C | 2.31246900  | -1.43115000 | 0.15723800  |
| H | 0.23069600  | -1.94265200 | 0.32182400  |
| C | 3.24308400  | -0.41302500 | -0.02402700 |
| H | 3.52240500  | 1.69926600  | -0.35128500 |
| H | 2.64482900  | -2.45899100 | 0.28617100  |
| H | 4.30683800  | -0.63981600 | -0.04155400 |
| N | -1.74413200 | -0.66202000 | -0.20803300 |
| N | -2.96240300 | -0.53242500 | -0.12775800 |
| N | -4.10007500 | -0.52096300 | -0.08395000 |
| H | -0.81534000 | 2.53181900  | 0.57859500  |

**3a**

|   |             |             |             |
|---|-------------|-------------|-------------|
| C | -1.16248700 | 0.85536000  | 0.00000000  |
| C | -0.00002900 | 2.94950700  | 0.00000400  |
| C | -1.19997700 | 2.25438200  | 0.00000500  |
| H | -2.13907200 | 2.79906500  | 0.00001000  |
| C | -2.39912400 | 0.03227200  | 0.00000100  |
| C | -2.30941200 | -1.36590500 | -0.00000800 |
| C | -3.67450300 | 0.61215200  | 0.00001000  |
| C | -3.45190200 | -2.15589300 | -0.00000700 |
| H | -1.32550300 | -1.82800000 | -0.00001500 |
| C | -4.81793400 | -0.17820800 | 0.00001100  |
| H | -3.79179300 | 1.69298700  | 0.00001700  |
| C | -4.71339900 | -1.56609700 | 0.00000200  |
| H | -3.35613700 | -3.23982000 | -0.00001400 |
| H | -5.79711600 | 0.29601800  | 0.00001800  |
| H | -5.60891200 | -2.18381000 | 0.00000200  |

|   |             |             |             |
|---|-------------|-------------|-------------|
| H | -0.00010000 | 4.03722800  | 0.00001300  |
| C | 1.19999800  | 2.25443600  | -0.00001000 |
| H | 2.13909900  | 2.79912300  | -0.00001000 |
| C | 1.16255900  | 0.85538800  | -0.00002100 |
| C | 2.39913600  | 0.03228500  | -0.00000900 |
| C | 3.67446500  | 0.61214300  | -0.00000100 |
| C | 2.30940900  | -1.36592500 | -0.00000500 |
| C | 4.81793600  | -0.17825000 | 0.00001000  |
| H | 3.79190800  | 1.69297300  | -0.00000300 |
| C | 3.45184700  | -2.15589100 | 0.00000600  |
| H | 1.32544100  | -1.82790800 | -0.00001100 |
| C | 4.71339900  | -1.56610400 | 0.00001300  |
| H | 5.79707600  | 0.29606100  | 0.00001500  |
| H | 3.35610100  | -3.23982100 | 0.00000800  |
| H | 5.60887100  | -2.18387200 | 0.00002100  |
| N | 0.00003500  | 0.19083800  | -0.00000800 |

**Mn(acac)<sub>3</sub> (Quintet)**

|    |             |             |             |
|----|-------------|-------------|-------------|
| Mn | 0.22178500  | -0.18352500 | -0.04617000 |
| O  | 1.57574200  | -0.31940800 | -1.41836900 |
| O  | -0.46358000 | -2.18151100 | -0.52419700 |
| O  | -1.01376300 | 0.57061800  | -1.38057700 |
| O  | 0.70590000  | 1.93267300  | 0.40917600  |
| O  | -1.15373500 | -0.12777300 | 1.30103000  |
| O  | 1.51749300  | -0.75977600 | 1.32838200  |
| C  | 2.84482300  | -0.28449100 | -1.22335400 |
| C  | 2.78951800  | -0.67020900 | 1.21187200  |
| C  | 3.46740200  | -0.38846500 | 0.02050800  |
| H  | 4.55170900  | -0.34713100 | 0.04979200  |
| C  | 3.66485200  | -0.14696600 | -2.46226500 |
| H  | 4.73562600  | -0.11459300 | -2.24936500 |
| H  | 3.36863300  | 0.76611200  | -2.99185700 |
| H  | 3.45258200  | -0.98925700 | -3.13131000 |
| C  | 3.56176300  | -0.92214300 | 2.46444300  |
| H  | 3.21587000  | -0.23471700 | 3.24510900  |
| H  | 4.63811200  | -0.80215000 | 2.32215300  |
| H  | 3.35410300  | -1.93925900 | 2.81755500  |
| C  | -1.71681400 | 1.64307200  | -1.22207000 |
| C  | -0.16538700 | 2.84311500  | 0.31038600  |
| C  | -1.37407100 | 2.72314900  | -0.41895200 |
| H  | -2.05381300 | 3.57084300  | -0.40966100 |
| C  | 0.12345300  | 4.13933000  | 1.00519900  |
| H  | -0.67944300 | 4.87258700  | 0.89300500  |
| H  | 1.05305400  | 4.56252400  | 0.60589600  |

|   |             |             |             |
|---|-------------|-------------|-------------|
| H | 0.29258500  | 3.94779700  | 2.07151400  |
| C | -2.99011300 | 1.66383000  | -2.00544400 |
| H | -3.53433400 | 2.60580300  | -1.90129800 |
| H | -3.62693500 | 0.83782400  | -1.66146300 |
| H | -2.77622100 | 1.48173100  | -3.06528800 |
| C | -2.29275000 | -0.74153600 | 1.25377300  |
| C | -1.64223300 | -2.57517800 | -0.29516700 |
| C | -2.57970100 | -1.86960900 | 0.49915400  |
| H | -3.57600400 | -2.29152700 | 0.59739600  |
| C | -2.04355300 | -3.89224100 | -0.88362800 |
| H | -1.77737400 | -3.91518800 | -1.94624900 |
| H | -3.10908800 | -4.10489900 | -0.76591500 |
| H | -1.46941700 | -4.68784100 | -0.39218100 |
| C | -3.34176400 | -0.13414400 | 2.12690700  |
| H | -4.27575600 | -0.70098100 | 2.11331700  |
| H | -3.53364600 | 0.89154000  | 1.78475600  |
| H | -2.97189400 | -0.06474700 | 3.15661100  |

**Mn(acac)<sub>3</sub> (Triplet)**

|    |             |             |             |
|----|-------------|-------------|-------------|
| Mn | 0.00000000  | 0.00000000  | 0.00925400  |
| O  | 0.00000000  | 1.93271400  | -0.07347900 |
| O  | 1.34953500  | 0.10941400  | 1.39391900  |
| O  | 1.42687400  | 0.02235000  | -1.29727000 |
| O  | -1.42687400 | -0.02235000 | -1.29727000 |
| O  | 0.00000000  | -1.93271400 | -0.07347900 |
| O  | -1.34953500 | -0.10941400 | 1.39391900  |
| C  | -0.75267900 | 2.68629100  | 0.63692900  |
| C  | -1.92527600 | 0.90616400  | 1.92131300  |
| C  | -1.67608700 | 2.24253500  | 1.58970400  |
| H  | -2.24417400 | 3.00033800  | 2.12100200  |
| C  | -0.58402400 | 4.15109400  | 0.39480600  |
| H  | -1.26514500 | 4.75607400  | 0.99775100  |
| H  | -0.75063400 | 4.36539200  | -0.66741500 |
| H  | 0.44965200  | 4.43871600  | 0.62129800  |
| C  | -2.93992900 | 0.58094900  | 2.96869200  |
| H  | -3.73515000 | -0.03040000 | 2.52571000  |
| H  | -3.38114300 | 1.47506000  | 3.41526000  |
| H  | -2.47061200 | -0.02340100 | 3.75382600  |
| C  | 1.24412800  | 0.02109200  | -2.56466600 |
| C  | -1.24412800 | -0.02109200 | -2.56466600 |
| C  | 0.00000000  | 0.00000000  | -3.20429100 |
| H  | 0.00000000  | 0.00000000  | -4.29021100 |
| C  | -2.49544600 | -0.04229900 | -3.38098900 |
| H  | -2.29478800 | -0.03162500 | -4.45484700 |

|   |             |             |             |
|---|-------------|-------------|-------------|
| H | -3.11288400 | 0.82530400  | -3.11945400 |
| H | -3.07768600 | -0.93702800 | -3.13090900 |
| C | 2.49544600  | 0.04229900  | -3.38098900 |
| H | 2.29478800  | 0.03162500  | -4.45484700 |
| H | 3.11288400  | -0.82530400 | -3.11945400 |
| H | 3.07768600  | 0.93702800  | -3.13090900 |
| C | 0.75267900  | -2.68629100 | 0.63692900  |
| C | 1.92527600  | -0.90616400 | 1.92131300  |
| C | 1.67608700  | -2.24253500 | 1.58970400  |
| H | 2.24417400  | -3.00033800 | 2.12100200  |
| C | 2.93992900  | -0.58094900 | 2.96869200  |
| H | 3.73515000  | 0.03040000  | 2.52571000  |
| H | 3.38114300  | -1.47506000 | 3.41526000  |
| H | 2.47061200  | 0.02340100  | 3.75382600  |
| C | 0.58402400  | -4.15109400 | 0.39480600  |
| H | 1.26514500  | -4.75607400 | 0.99775100  |
| H | 0.75063400  | -4.36539200 | -0.66741500 |
| H | -0.44965200 | -4.43871600 | 0.62129800  |

**Mn(acac)<sub>3</sub> (Singlet)**

|    |             |             |             |
|----|-------------|-------------|-------------|
| Mn | -0.12919000 | -0.13668100 | 0.01618600  |
| O  | -1.46585900 | -0.88357400 | -1.25341100 |
| O  | -0.62343400 | 1.59231800  | -0.65455000 |
| O  | 1.18612400  | -0.23552100 | -1.34855000 |
| O  | 0.34056100  | -1.93275200 | 0.58988800  |
| O  | 1.16465800  | 0.56193700  | 1.24265100  |
| O  | -1.44787300 | -0.09899500 | 1.41676700  |
| C  | -2.72501100 | -0.78432300 | -1.12372600 |
| C  | -2.72487300 | -0.09000500 | 1.24731000  |
| C  | -3.37576700 | -0.34918500 | 0.04605400  |
| H  | -4.46159600 | -0.32695700 | 0.04254600  |
| C  | -3.53752900 | -1.19887800 | -2.30817100 |
| H  | -4.61233500 | -1.16083500 | -2.11577300 |
| H  | -3.25600600 | -2.21577400 | -2.60535000 |
| H  | -3.30020100 | -0.54175300 | -3.15366200 |
| C  | -3.51873700 | 0.18321400  | 2.48245600  |
| H  | -3.33777600 | -0.61678800 | 3.21101400  |
| H  | -4.59136900 | 0.24639300  | 2.28371000  |
| H  | -3.17553700 | 1.11746700  | 2.94183800  |
| C  | 2.31412300  | -0.84446000 | -1.21017400 |
| C  | 1.50873800  | -2.43273300 | 0.48402900  |
| C  | 2.53383000  | -1.87332600 | -0.29959700 |
| H  | 3.49820100  | -2.37280600 | -0.31374600 |
| C  | 1.73784300  | -3.72473600 | 1.19532400  |

|   |             |             |             |
|---|-------------|-------------|-------------|
| H | 1.39090600  | -3.64612700 | 2.23128800  |
| H | 2.78815300  | -4.02576400 | 1.17912600  |
| H | 1.14066200  | -4.50834900 | 0.71236100  |
| C | 3.39173600  | -0.39738700 | -2.13822200 |
| H | 4.31077000  | -0.97694700 | -2.02388900 |
| H | 3.60575200  | 0.66167600  | -1.94182100 |
| H | 3.04196200  | -0.46587300 | -3.17483800 |
| C | 1.70991600  | 1.71528500  | 1.12098300  |
| C | 0.10308400  | 2.64030500  | -0.52614500 |
| C | 1.26057300  | 2.72106200  | 0.25772100  |
| H | 1.79076900  | 3.66894400  | 0.27415200  |
| C | -0.38160300 | 3.84665800  | -1.26114300 |
| H | -0.50770100 | 3.60483800  | -2.32273500 |
| H | 0.29539200  | 4.69824100  | -1.15975900 |
| H | -1.36934300 | 4.12927500  | -0.87688700 |
| C | 2.89506100  | 1.95032600  | 1.99782300  |
| H | 3.29128800  | 2.96453900  | 1.90852000  |
| H | 3.67966200  | 1.23134500  | 1.72754800  |
| H | 2.62637400  | 1.75409000  | 3.04221200  |

**Mn(acac)<sub>2</sub>**

|    |             |             |             |
|----|-------------|-------------|-------------|
| Mn | 0.00000400  | 0.11579500  | -0.00005500 |
| O  | 1.40505400  | -1.04393000 | -0.98635400 |
| O  | -1.40499400 | -1.04403700 | 0.98621600  |
| O  | -1.55104400 | 1.13519000  | -0.94365400 |
| O  | 1.55098200  | 1.13527900  | 0.94356300  |
| C  | 2.67285800  | -0.96336000 | -0.86555300 |
| C  | 2.79834800  | 0.91368000  | 0.79493600  |
| C  | 3.36534800  | -0.06026200 | -0.04315100 |
| H  | 4.45047000  | -0.12195400 | -0.05526200 |
| C  | 3.46435800  | -1.93446700 | -1.68967400 |
| H  | 4.54395500  | -1.83782100 | -1.54843600 |
| H  | 3.22658100  | -1.78661300 | -2.75023700 |
| H  | 3.15894700  | -2.95686100 | -1.43579000 |
| C  | 3.71140800  | 1.78692200  | 1.60243700  |
| H  | 3.52099500  | 2.83788800  | 1.35296800  |
| H  | 4.76987700  | 1.56667300  | 1.44160700  |
| H  | 3.47756200  | 1.66662200  | 2.66735400  |
| C  | -2.79840400 | 0.91366700  | -0.79486800 |
| C  | -2.67281100 | -0.96338400 | 0.86559600  |
| C  | -3.36535700 | -0.06021000 | 0.04332600  |
| H  | -4.45048100 | -0.12183600 | 0.05558000  |
| C  | -3.46425100 | -1.93451300 | 1.68974800  |
| H  | -3.15916600 | -2.95691200 | 1.43548200  |

|   |             |             |             |
|---|-------------|-------------|-------------|
| H | -4.54387500 | -1.83759100 | 1.54890100  |
| H | -3.22606600 | -1.78700000 | 2.75026500  |
| C | -3.71151300 | 1.78686400  | -1.60236300 |
| H | -4.76999000 | 1.56711700  | -1.44090100 |
| H | -3.47825900 | 1.66587000  | -2.66733500 |
| H | -3.52053600 | 2.83788700  | -1.35358000 |

**Hacac**

|   |             |             |             |
|---|-------------|-------------|-------------|
| O | 1.27530300  | 1.26476500  | 0.00000500  |
| O | -1.29964800 | 1.23856600  | -0.00000900 |
| C | 1.24740100  | 0.01389400  | 0.00001000  |
| C | -1.19506600 | -0.08411000 | -0.00000700 |
| C | 0.01460300  | -0.72260800 | 0.00000300  |
| H | 0.03854100  | -1.80875100 | -0.00002100 |
| C | -2.50160200 | -0.78307500 | 0.00000100  |
| H | -2.37870600 | -1.86843300 | -0.00017700 |
| H | -3.08188800 | -0.48372600 | -0.88125000 |
| H | -3.08171300 | -0.48402100 | 0.88147000  |
| C | 2.52523400  | -0.76530900 | -0.00000400 |
| H | 2.56812900  | -1.41865100 | -0.88005000 |
| H | 2.56844100  | -1.41821800 | 0.88034600  |
| H | 3.38639600  | -0.09231600 | -0.00033000 |
| H | -0.36785600 | 1.59472000  | 0.00002800  |

**A**

|   |             |             |             |
|---|-------------|-------------|-------------|
| C | 2.34889300  | -0.75464600 | -0.71920400 |
| C | 2.34886900  | -0.75463700 | 0.71929600  |
| C | 1.42304400  | 0.35161500  | -0.00005100 |
| H | 3.17235600  | -0.28569500 | -1.25007800 |
| H | 1.77796200  | -1.50242500 | -1.26531600 |
| H | 3.17228400  | -0.28564900 | 1.25021300  |
| H | 1.77785300  | -1.50235900 | 1.26539200  |
| O | 1.90066400  | 1.53791500  | -0.00006100 |
| C | -0.04908500 | 0.11676900  | -0.00000800 |
| C | -0.62710300 | -1.15895500 | -0.00002600 |
| C | -0.89032200 | 1.23459800  | 0.00003000  |
| C | -2.00930800 | -1.30721000 | -0.00002600 |
| H | -0.00563000 | -2.05301000 | -0.00002800 |
| C | -2.27160500 | 1.08464200  | 0.00003200  |
| H | -0.44439300 | 2.22644400  | 0.00005500  |
| C | -2.83772500 | -0.18771300 | -0.00000400 |
| H | -2.44098000 | -2.30589300 | -0.00004800 |
| H | -2.90975800 | 1.96599600  | 0.00006600  |
| H | -3.91894300 | -0.30750500 | -0.00001500 |



**TS<sub>A</sub>**

|   |             |             |             |
|---|-------------|-------------|-------------|
| C | 2.35669300  | -0.77174000 | -0.57933000 |
| C | 2.34889600  | -0.75713000 | 0.86790500  |
| C | 1.41603800  | 0.37690500  | -0.16645800 |
| H | 3.24538000  | -0.38539700 | -1.07447500 |
| H | 1.87331100  | -1.60624100 | -1.08550600 |
| H | 3.09949300  | -0.19023300 | 1.41043800  |
| H | 1.69342000  | -1.41117400 | 1.43647200  |
| O | 1.88218200  | 1.54847800  | -0.12740500 |
| C | -0.04984100 | 0.12489600  | -0.07794600 |
| C | -0.62053600 | -1.15343800 | -0.12806700 |
| C | -0.89413700 | 1.23506100  | 0.03764500  |
| C | -1.99960600 | -1.31186200 | -0.06138700 |
| H | 0.00634900  | -2.03936700 | -0.21348000 |
| C | -2.27225600 | 1.07509200  | 0.10166900  |
| H | -0.45086100 | 2.22742100  | 0.07386400  |
| C | -2.83076400 | -0.19991800 | 0.05252600  |
| H | -2.42741200 | -2.31132600 | -0.10060400 |
| H | -2.91416200 | 1.94906700  | 0.19036000  |
| H | -3.90989800 | -0.32777100 | 0.10283800  |

**B**

|   |             |             |             |
|---|-------------|-------------|-------------|
| C | 2.40831000  | -0.39510800 | -0.39712700 |
| C | 2.45618400  | -1.34186800 | 0.74682700  |
| C | 1.34813500  | 0.66721900  | -0.19181100 |
| H | 3.35933800  | 0.14408500  | -0.53042700 |
| H | 2.20608600  | -0.93149600 | -1.33387800 |
| H | 2.46921700  | -0.96499600 | 1.76697200  |
| H | 2.55956100  | -2.41184000 | 0.59166500  |
| O | 1.66378500  | 1.84621800  | -0.08367200 |
| C | -0.07661200 | 0.25065000  | -0.10135800 |
| C | -0.48731300 | -1.07504400 | -0.28905000 |
| C | -1.03845000 | 1.23289700  | 0.16374100  |
| C | -1.83439100 | -1.40761500 | -0.21016000 |
| H | 0.24260900  | -1.85422200 | -0.49856900 |
| C | -2.38248200 | 0.89933300  | 0.24557100  |
| H | -0.71203300 | 2.26054600  | 0.30599500  |
| C | -2.78189000 | -0.42295700 | 0.05846800  |
| H | -2.14606300 | -2.43883200 | -0.35894500 |
| H | -3.12241300 | 1.66859600  | 0.45434900  |
| H | -3.83553400 | -0.68662200 | 0.12160800  |

**TS<sub>B</sub>**

|          |             |             |             |
|----------|-------------|-------------|-------------|
| O        | 0.50635500  | -0.03686000 | -1.93427100 |
| C        | -0.45946700 | 0.59786500  | -1.52655400 |
| C        | -0.74660400 | 2.73640500  | -0.17950200 |
| C        | -0.41388200 | 2.11002000  | -1.48932000 |
| H        | -0.42991200 | 3.76460900  | -0.01932100 |
| H        | -1.11265500 | 2.46750600  | -2.27128600 |
| H        | 0.58887400  | 2.40395400  | -1.82373500 |
| C        | -1.68723900 | -0.10792300 | -1.07614400 |
| C        | -1.57911800 | -1.45467600 | -0.70808100 |
| C        | -2.93627800 | 0.52156400  | -1.02073800 |
| C        | -2.69479700 | -2.15371300 | -0.26896600 |
| H        | -0.60432800 | -1.93643300 | -0.75837400 |
| C        | -4.05693100 | -0.18642100 | -0.60129800 |
| H        | -3.04169500 | 1.56180800  | -1.32225400 |
| C        | -3.93535100 | -1.51917500 | -0.21628400 |
| H        | -2.60145500 | -3.19512500 | 0.03046200  |
| H        | -5.02694000 | 0.30425900  | -0.57128800 |
| H        | -4.81132800 | -2.06745400 | 0.12380500  |
| H        | -1.63624000 | 2.42253900  | 0.36224900  |
| C        | 0.78744900  | 1.87177700  | 1.57462000  |
| H        | -0.00243300 | 2.21594400  | 2.23711300  |
| C        | 1.02207100  | 0.54727200  | 1.39663400  |
| C        | 2.15829800  | -0.03550800 | 0.67613600  |
| C        | 3.09437000  | 0.78196300  | 0.02309700  |
| C        | 2.31147800  | -1.42621500 | 0.58113400  |
| C        | 4.13997200  | 0.22594700  | -0.69938800 |
| H        | 2.99915400  | 1.86499500  | 0.06309900  |
| C        | 3.36240000  | -1.97918300 | -0.14171700 |
| H        | 1.59501700  | -2.07932000 | 1.07370700  |
| C        | 4.28069000  | -1.15819900 | -0.78836200 |
| H        | 4.84914300  | 0.87961700  | -1.20301900 |
| H        | 3.45949800  | -3.06124100 | -0.20215300 |
| H        | 5.09901600  | -1.59128000 | -1.35928400 |
| N        | 0.11305600  | -0.43997200 | 1.88448800  |
| N        | -1.00600400 | -0.07166100 | 2.22453000  |
| N        | -2.07554100 | 0.15416800  | 2.55167500  |
| H        | 1.52250100  | 2.61197800  | 1.27799900  |
| <b>C</b> |             |             |             |
| O        | -0.64799200 | 0.05357600  | -2.44107200 |
| C        | 0.36379900  | -0.35862200 | -1.88026100 |
| C        | 0.93512900  | -2.51530500 | -0.55550200 |
| C        | 0.68674800  | -1.83371500 | -1.90147700 |
| H        | 1.12075300  | -3.57896000 | -0.74922400 |

|   |             |             |             |
|---|-------------|-------------|-------------|
| H | 1.57982200  | -1.96703100 | -2.53068800 |
| H | -0.14739400 | -2.32008700 | -2.42318900 |
| C | 1.27418400  | 0.59285800  | -1.19096700 |
| C | 0.76161400  | 1.84301400  | -0.82268500 |
| C | 2.60126500  | 0.27761400  | -0.87772300 |
| C | 1.54540000  | 2.74321800  | -0.11575500 |
| H | -0.26893300 | 2.08265700  | -1.07773000 |
| C | 3.39136200  | 1.18790600  | -0.18435600 |
| H | 3.03025000  | -0.67274500 | -1.18930100 |
| C | 2.86070700  | 2.41362300  | 0.20941600  |
| H | 1.13351000  | 3.70404800  | 0.18491900  |
| H | 4.42309100  | 0.93800200  | 0.05242700  |
| H | 3.47564500  | 3.11772900  | 0.76594600  |
| H | 1.85643600  | -2.13485700 | -0.09928400 |
| C | -0.22998000 | -2.41897900 | 0.43873000  |
| H | 0.01497600  | -3.04826300 | 1.30978700  |
| C | -0.53584400 | -1.04089800 | 0.93185700  |
| C | -1.73331800 | -0.29910800 | 0.67466500  |
| C | -2.72825900 | -0.78067000 | -0.20872600 |
| C | -1.95032700 | 0.96584700  | 1.27583100  |
| C | -3.87176000 | -0.04173400 | -0.46550400 |
| H | -2.59594600 | -1.73463500 | -0.71396000 |
| C | -3.09681800 | 1.69532000  | 1.01110800  |
| H | -1.20101700 | 1.36692400  | 1.95459900  |
| C | -4.06953500 | 1.19951500  | 0.14049900  |
| H | -4.61807000 | -0.43711100 | -1.15157300 |
| H | -3.23684900 | 2.66271300  | 1.48948100  |
| H | -4.96904500 | 1.77523300  | -0.06534100 |
| N | 0.36822200  | -0.41730800 | 1.78651300  |
| N | 1.41759400  | -0.96598800 | 2.12003000  |
| N | 2.42647900  | -1.34507700 | 2.50845800  |
| H | -1.12556300 | -2.86290600 | -0.00820100 |

**TS<sub>c</sub>**

|   |             |             |             |
|---|-------------|-------------|-------------|
| O | 0.43600000  | -0.65800000 | -1.89300000 |
| C | -0.46600000 | 0.11300000  | -1.58300000 |
| C | -0.44300000 | 2.43400000  | -0.48200000 |
| C | -0.29900000 | 1.60300000  | -1.76000000 |
| H | -0.49300000 | 3.49200000  | -0.76500000 |
| H | -1.05500000 | 1.94400000  | -2.48200000 |
| H | 0.68400000  | 1.76500000  | -2.22000000 |
| C | -1.73300000 | -0.41400000 | -1.00900000 |
| C | -1.70100000 | -1.66700000 | -0.38500000 |
| C | -2.93700000 | 0.29600000  | -1.06500000 |

|   |             |             |             |
|---|-------------|-------------|-------------|
| C | -2.85000000 | -2.19400000 | 0.18800000  |
| H | -0.75700000 | -2.20600000 | -0.34100000 |
| C | -4.09100000 | -0.24200000 | -0.50700000 |
| H | -2.98300000 | 1.26400000  | -1.56000000 |
| C | -4.04700000 | -1.48200000 | 0.12500000  |
| H | -2.81500000 | -3.16100000 | 0.68600000  |
| H | -5.02700000 | 0.30800000  | -0.56400000 |
| H | -4.94900000 | -1.89600000 | 0.57100000  |
| H | -1.39600000 | 2.20500000  | 0.00900000  |
| C | 0.70500000  | 2.29000000  | 0.52600000  |
| H | 0.45800000  | 2.88800000  | 1.41200000  |
| C | 0.94400000  | 0.87900000  | 0.99100000  |
| C | 2.14700000  | 0.12300000  | 0.55900000  |
| C | 3.11200000  | 0.68300000  | -0.28700000 |
| C | 2.31200000  | -1.20900000 | 0.97400000  |
| C | 4.21200000  | -0.06400000 | -0.69800000 |
| H | 3.02100000  | 1.70500000  | -0.64300000 |
| C | 3.40800000  | -1.95000000 | 0.56300000  |
| H | 1.56500000  | -1.65900000 | 1.62300000  |
| C | 4.36400000  | -1.37900000 | -0.27700000 |
| H | 4.95000000  | 0.39000000  | -1.35500000 |
| H | 3.51700000  | -2.98000000 | 0.89500000  |
| H | 5.22300000  | -1.96200000 | -0.60200000 |
| N | 0.12600000  | 0.22300000  | 1.74600000  |
| N | -1.04100000 | 1.09000000  | 2.21000000  |
| N | -2.06500000 | 0.61900000  | 2.49300000  |
| H | 1.61600000  | 2.71600000  | 0.10200000  |

**D**

|   |            |             |             |
|---|------------|-------------|-------------|
| O | 0.76786400 | 0.51587900  | 1.98456900  |
| C | 1.50060900 | 0.91518000  | 1.08321200  |
| C | 0.47520200 | 2.42839000  | -0.68789800 |
| C | 1.34972600 | 2.32297800  | 0.56940300  |
| H | 0.44520000 | 3.48736700  | -0.96863200 |
| H | 2.32987100 | 2.77030800  | 0.36771800  |
| H | 0.87933600 | 2.89905000  | 1.37592700  |
| C | 2.52396700 | 0.01660500  | 0.48706200  |
| C | 2.59347300 | -1.30556600 | 0.94301900  |
| C | 3.40081800 | 0.43914500  | -0.51820600 |
| C | 3.52466700 | -2.18546400 | 0.41264900  |
| H | 1.90243300 | -1.62804600 | 1.71845800  |
| C | 4.33288900 | -0.44422900 | -1.05147700 |
| H | 3.36187500 | 1.45967900  | -0.89239200 |
| C | 4.39714200 | -1.75460700 | -0.58638100 |

|   |             |             |             |
|---|-------------|-------------|-------------|
| H | 3.57269200  | -3.21033100 | 0.77368200  |
| H | 5.01142100  | -0.10803500 | -1.83205000 |
| H | 5.12824400  | -2.44378800 | -1.00372000 |
| H | 0.94139600  | 1.89614900  | -1.52767300 |
| C | -0.95641000 | 1.94538700  | -0.48503600 |
| H | -1.62748100 | 2.44560800  | -1.19758600 |
| C | -1.17868000 | 0.45717300  | -0.66416200 |
| C | -2.51888300 | -0.11558400 | -0.35343300 |
| C | -3.60603700 | 0.70120500  | -0.03055600 |
| C | -2.69644100 | -1.50480700 | -0.39477200 |
| C | -4.84816500 | 0.13681600  | 0.24452100  |
| H | -3.49483700 | 1.78223200  | 0.00562800  |
| C | -3.93520700 | -2.06398900 | -0.11842800 |
| H | -1.84891200 | -2.14225700 | -0.64109200 |
| C | -5.01582300 | -1.24326800 | 0.20212000  |
| H | -5.68777300 | 0.78178500  | 0.49385300  |
| H | -4.06020200 | -3.14404500 | -0.15045100 |
| H | -5.98728200 | -1.68167200 | 0.42008900  |
| N | -0.25040700 | -0.28414700 | -1.09217600 |
| H | -1.31313000 | 2.22580300  | 0.51711000  |

**TS<sub>D</sub>**

|   |             |             |             |
|---|-------------|-------------|-------------|
| O | 1.68576600  | 1.07233500  | 2.25201700  |
| C | 1.42882700  | 0.96740500  | 1.00807100  |
| C | 0.48921200  | 2.41769700  | -0.96939100 |
| C | 1.26282600  | 2.36663400  | 0.32667800  |
| H | 0.56514000  | 3.42703700  | -1.39291200 |
| H | 2.29306500  | 2.72651400  | 0.20450000  |
| H | 0.78730400  | 3.00114800  | 1.08513100  |
| C | 2.23461100  | -0.07879600 | 0.26088300  |
| C | 2.24645100  | -1.37270400 | 0.79208900  |
| C | 3.02069200  | 0.19798900  | -0.85706100 |
| C | 3.00653600  | -2.37535100 | 0.20571600  |
| H | 1.64319200  | -1.58305200 | 1.67528400  |
| C | 3.79449800  | -0.80489300 | -1.44034100 |
| H | 3.05299400  | 1.20107300  | -1.27771400 |
| C | 3.78508200  | -2.09251700 | -0.91657500 |
| H | 2.99691600  | -3.37976800 | 0.62430200  |
| H | 4.40795300  | -0.57301300 | -2.30866800 |
| H | 4.38395200  | -2.87507100 | -1.37779200 |
| H | 0.91332100  | 1.72964800  | -1.71212000 |
| C | -0.96414700 | 2.07637400  | -0.73425400 |
| H | -1.51618500 | 1.95341100  | -1.67223900 |
| C | -1.07777500 | 0.79981100  | 0.06588800  |

|   |             |             |             |
|---|-------------|-------------|-------------|
| C | -2.32951600 | 0.00065700  | -0.02546300 |
| C | -3.53000300 | 0.60556300  | -0.40900700 |
| C | -2.31219000 | -1.36337400 | 0.28950500  |
| C | -4.69939100 | -0.14536300 | -0.46713500 |
| H | -3.56107000 | 1.66589300  | -0.64976700 |
| C | -3.47956700 | -2.11010400 | 0.21793100  |
| H | -1.37251300 | -1.83334500 | 0.57401800  |
| C | -4.67607600 | -1.50182200 | -0.15767500 |
| H | -5.63142800 | 0.33323700  | -0.75876900 |
| H | -3.45681800 | -3.17178300 | 0.45274200  |
| H | -5.59071200 | -2.08803800 | -0.21225400 |
| N | -0.16162200 | 0.35642200  | 0.82198900  |
| H | -1.47032100 | 2.86922800  | -0.16294800 |

### E1

|   |             |             |             |
|---|-------------|-------------|-------------|
| O | 1.64845700  | 0.47854000  | 2.20986700  |
| C | 1.15664900  | 0.72673500  | 0.95534900  |
| C | 0.58918900  | 2.43189100  | -0.75647100 |
| C | 1.19275800  | 2.21235900  | 0.61691200  |
| H | 0.63373100  | 3.48944700  | -1.03964800 |
| H | 2.21175400  | 2.60162700  | 0.70564400  |
| H | 0.59016100  | 2.72364200  | 1.38166300  |
| C | 2.20187900  | -0.14217000 | 0.22266500  |
| C | 2.01734200  | -1.53243900 | 0.21306300  |
| C | 3.36918700  | 0.40088000  | -0.32778500 |
| C | 2.94823500  | -2.35669300 | -0.40450400 |
| H | 1.12861800  | -1.95315400 | 0.67572900  |
| C | 4.29299700  | -0.42882100 | -0.94935300 |
| H | 3.55221100  | 1.47173500  | -0.29622200 |
| C | 4.08606600  | -1.80712100 | -0.99068300 |
| H | 2.78835600  | -3.43231400 | -0.42299800 |
| H | 5.18345100  | 0.00272800  | -1.40078500 |
| H | 4.81738500  | -2.45215900 | -1.47270700 |
| H | 1.16983000  | 1.87912000  | -1.50874200 |
| C | -0.85076100 | 1.94731100  | -0.75596700 |
| H | -1.22021700 | 1.79626300  | -1.77806000 |
| C | -1.04571500 | 0.68025300  | 0.03656800  |
| C | -2.37758400 | 0.02018800  | -0.04947800 |
| C | -3.46414500 | 0.64396500  | -0.67397500 |
| C | -2.56612800 | -1.25316000 | 0.50414800  |
| C | -4.70402900 | 0.01545800  | -0.73695300 |
| H | -3.35499000 | 1.63335300  | -1.11144900 |
| C | -3.80051000 | -1.88293300 | 0.43562900  |
| H | -1.72402800 | -1.74334300 | 0.98707300  |

|          |             |             |             |
|----------|-------------|-------------|-------------|
| C        | -4.87629700 | -1.24948600 | -0.18494700 |
| H        | -5.53791100 | 0.51860500  | -1.22165900 |
| H        | -3.92589600 | -2.87434200 | 0.86601300  |
| H        | -5.84443400 | -1.74288300 | -0.23916200 |
| N        | -0.16613300 | 0.14059300  | 0.79749600  |
| H        | -1.50753500 | 2.71189400  | -0.31141800 |
| <b>F</b> |             |             |             |
| Mn       | -0.15331800 | 1.10918500  | 0.44397900  |
| O        | -1.64954800 | 0.75256200  | 1.67537300  |
| O        | -1.50395500 | 1.55098700  | -0.92450400 |
| O        | -0.06223100 | 3.21937300  | 0.84987800  |
| O        | 1.11709300  | 0.56833300  | 1.83915600  |
| C        | -1.52371000 | 2.63037200  | -1.62585100 |
| C        | -0.23617900 | 4.07922200  | -0.06574500 |
| C        | -0.89743900 | 3.82723500  | -1.28810700 |
| H        | -0.99988500 | 4.65553300  | -1.98391700 |
| C        | 0.28339400  | 5.45879900  | 0.20158200  |
| H        | 1.36304500  | 5.40450900  | 0.38673700  |
| H        | -0.17719900 | 5.84822900  | 1.11740000  |
| H        | 0.09447900  | 6.15433600  | -0.62016600 |
| C        | -2.32497000 | 2.53736400  | -2.88538500 |
| H        | -1.95982100 | 1.69564500  | -3.48698100 |
| H        | -2.28413900 | 3.45457100  | -3.47825300 |
| H        | -3.37063600 | 2.32031200  | -2.63461800 |
| C        | 0.85298400  | -0.12179500 | 2.88566200  |
| C        | -1.60015000 | 0.10069100  | 2.77606600  |
| C        | -0.43189000 | -0.40071700 | 3.35981900  |
| H        | -0.52429300 | -0.96624400 | 4.28218600  |
| C        | -2.91490700 | -0.09312400 | 3.45727900  |
| H        | -2.84741200 | -0.77244100 | 4.31071000  |
| H        | -3.64940400 | -0.47144800 | 2.73685500  |
| H        | -3.27913700 | 0.88122900  | 3.80695800  |
| C        | 2.05227700  | -0.61335700 | 3.62713000  |
| H        | 1.79061200  | -1.24940800 | 4.47598900  |
| H        | 2.63158300  | 0.24627400  | 3.98541700  |
| H        | 2.69913400  | -1.16769100 | 2.93405100  |
| O        | 1.24790500  | 1.14408500  | -0.80928300 |
| C        | 1.38644800  | -0.17624500 | -1.28509600 |
| C        | 1.17016800  | -1.55416000 | -3.35484700 |
| C        | 1.45050800  | -0.16480700 | -2.80992500 |
| H        | 1.25217300  | -1.57042700 | -4.44708500 |
| H        | 2.42549600  | 0.21909900  | -3.13456600 |
| H        | 0.67951300  | 0.53865200  | -3.16297700 |

|   |             |             |             |
|---|-------------|-------------|-------------|
| C | 2.62385100  | -0.83053100 | -0.67194600 |
| C | 2.60923900  | -2.12201700 | -0.14294400 |
| C | 3.81581300  | -0.10147600 | -0.63463800 |
| C | 3.76310100  | -2.67395700 | 0.41311500  |
| H | 1.68930100  | -2.70503400 | -0.15490800 |
| C | 4.96603800  | -0.64935600 | -0.07863000 |
| H | 3.83669000  | 0.90902600  | -1.04028900 |
| C | 4.94349000  | -1.93914600 | 0.44954200  |
| H | 3.73348700  | -3.68232000 | 0.82155300  |
| H | 5.88500400  | -0.06691600 | -0.05590800 |
| H | 5.84293800  | -2.36808900 | 0.88633900  |
| H | 1.91709800  | -2.26375000 | -2.97074500 |
| C | -0.22406300 | -1.98766000 | -2.93037100 |
| H | -0.38770400 | -3.06325900 | -3.07488500 |
| C | -0.53491500 | -1.62903000 | -1.50427000 |
| C | -1.75886200 | -2.18640600 | -0.88287900 |
| C | -2.88172900 | -2.51635500 | -1.64983300 |
| C | -1.79894300 | -2.38861700 | 0.50227300  |
| C | -4.03013000 | -3.00760600 | -1.03734600 |
| H | -2.87135000 | -2.37081800 | -2.72809100 |
| C | -2.94035500 | -2.89539900 | 1.10985000  |
| H | -0.91565600 | -2.16028300 | 1.09772300  |
| C | -4.06282700 | -3.19871000 | 0.34126500  |
| H | -4.90321500 | -3.24453200 | -1.64129000 |
| H | -2.95074400 | -3.05961100 | 2.18620400  |
| H | -4.95943400 | -3.59155000 | 0.81584800  |
| N | 0.18858800  | -0.85449500 | -0.78177100 |
| H | -0.97926400 | -1.48374700 | -3.55594700 |

**F1**

|   |            |             |             |
|---|------------|-------------|-------------|
| O | 1.52344400 | 1.03921400  | 2.17157400  |
| C | 1.16500000 | 0.84549300  | 0.81223900  |
| C | 0.66454700 | 2.04064300  | -1.32075700 |
| C | 1.24684400 | 2.17948200  | 0.07131200  |
| H | 0.72627300 | 2.98744800  | -1.86873900 |
| H | 2.28909700 | 2.52110800  | 0.05318100  |
| H | 0.66533600 | 2.91775700  | 0.64672100  |
| C | 2.17316100 | -0.15092000 | 0.25214300  |
| C | 1.80881000 | -1.14789400 | -0.65287900 |
| C | 3.51726400 | -0.03501000 | 0.61932000  |
| C | 2.76669800 | -2.01086400 | -1.18137800 |
| H | 0.76694700 | -1.26139600 | -0.94614600 |
| C | 4.47342700 | -0.89716800 | 0.09441300  |
| H | 3.81365600 | 0.73747800  | 1.32599000  |



|   |             |             |             |
|---|-------------|-------------|-------------|
| C | 4.10108000  | -1.88980200 | -0.80923400 |
| H | 2.46330700  | -2.78392300 | -1.88458400 |
| H | 5.51466000  | -0.79351400 | 0.39343500  |
| H | 4.84845200  | -2.56556900 | -1.21985700 |
| H | 1.25081100  | 1.30824200  | -1.89337300 |
| C | -0.78330800 | 1.58685900  | -1.22088500 |
| H | -1.12586500 | 1.14223700  | -2.16441200 |
| C | -1.02876000 | 0.60920700  | -0.09964500 |
| C | -2.38402300 | -0.00407700 | -0.01463400 |
| C | -3.43779000 | 0.42548000  | -0.82990900 |
| C | -2.62758100 | -1.03469500 | 0.90303900  |
| C | -4.69868600 | -0.15442200 | -0.72567000 |
| H | -3.28658800 | 1.22420900  | -1.55205400 |
| C | -3.88303900 | -1.61646400 | 1.00368800  |
| H | -1.81010500 | -1.37403100 | 1.53420100  |
| C | -4.92572900 | -1.17698900 | 0.18925700  |
| H | -5.50608300 | 0.19639500  | -1.36489100 |
| H | -4.05087300 | -2.41872900 | 1.71928900  |
| H | -5.91071400 | -1.63235800 | 0.26757400  |
| N | -0.17163900 | 0.27328300  | 0.79294300  |
| H | -1.44082600 | 2.45299200  | -1.04539000 |
| H | 0.91894100  | 1.70181400  | 2.53334300  |

**A1**

|    |             |             |             |
|----|-------------|-------------|-------------|
| Mn | -0.45600800 | -0.52415900 | -0.13772800 |
| O  | 0.82085900  | -1.26555300 | -1.43765500 |
| O  | -2.15475200 | -1.59483700 | -0.83227700 |
| O  | -1.56908400 | 0.20288100  | 1.27762500  |
| O  | 0.30767400  | -1.71611600 | 1.24779500  |
| C  | -3.33420000 | -1.15796300 | -0.66538400 |
| C  | -2.84216800 | 0.39797900  | 1.21330000  |
| C  | -3.70001600 | -0.17058800 | 0.27648000  |
| H  | -4.75160300 | 0.09463200  | 0.34169700  |
| C  | -3.38725500 | 1.28386200  | 2.28650300  |
| H  | -3.28411000 | 0.77777700  | 3.25478100  |
| H  | -4.44046300 | 1.52915400  | 2.12860800  |
| H  | -2.79605200 | 2.20569800  | 2.34263200  |
| C  | -4.40005400 | -1.77133600 | -1.51938100 |
| H  | -4.14388000 | -1.61951000 | -2.57487100 |
| H  | -5.39325500 | -1.35813200 | -1.32662000 |
| H  | -4.41981800 | -2.85448100 | -1.34941200 |
| C  | 1.48301600  | -2.22561600 | 1.22940300  |
| C  | 1.94141000  | -1.82427100 | -1.15985500 |
| C  | 2.32583400  | -2.25282200 | 0.11340000  |

|   |             |             |             |
|---|-------------|-------------|-------------|
| H | 3.30192500  | -2.71582800 | 0.22236500  |
| C | 2.85579600  | -2.02260700 | -2.32340900 |
| H | 2.36538900  | -2.66696700 | -3.06310700 |
| H | 3.80966400  | -2.46924700 | -2.03315100 |
| H | 3.03602900  | -1.05693700 | -2.81137000 |
| C | 1.93766100  | -2.82709500 | 2.51816600  |
| H | 2.91614400  | -3.30576900 | 2.43544300  |
| H | 1.19813000  | -3.56050100 | 2.85972700  |
| H | 1.98402300  | -2.03926600 | 3.28059100  |
| O | -0.68253900 | 0.96970500  | -1.24041300 |
| C | -0.14932400 | 2.15565200  | -0.74671400 |
| C | -0.49220200 | 3.39225000  | -1.52529600 |
| C | -1.08994400 | 3.16399100  | -0.16067600 |
| H | -1.14403100 | 3.25947100  | -2.38617000 |
| H | 0.27970900  | 4.15190800  | -1.63533500 |
| H | -0.74918100 | 3.78617200  | 0.66556800  |
| H | -2.14079600 | 2.87912800  | -0.12611200 |
| C | 1.23204700  | 1.98751900  | -0.18334100 |
| C | 2.30941900  | 1.79358600  | -1.05414600 |
| C | 1.44654700  | 1.87566400  | 1.19354400  |
| C | 3.57367100  | 1.49094800  | -0.56038200 |
| H | 2.14199300  | 1.87517900  | -2.12882300 |
| C | 2.71354200  | 1.57305400  | 1.69107000  |
| H | 0.61122200  | 2.02305700  | 1.87834200  |
| C | 3.77681800  | 1.37541600  | 0.81483900  |
| H | 4.40454500  | 1.34439200  | -1.24804800 |
| H | 2.86796800  | 1.49108100  | 2.76532800  |
| H | 4.76578100  | 1.13859500  | 1.20180500  |

**TS<sub>A1</sub>**

|    |             |             |             |
|----|-------------|-------------|-------------|
| Mn | -0.98289800 | 0.38628600  | -0.35613600 |
| O  | -0.72436300 | 2.49327600  | -0.35213300 |
| O  | -2.82211800 | 0.68352800  | 0.67849700  |
| O  | -2.04660000 | -1.01235000 | -1.51651300 |
| O  | 0.64449500  | 0.39830900  | -1.70925800 |
| C  | -3.73824900 | -0.19380800 | 0.78536800  |
| C  | -3.06169100 | -1.67301200 | -1.11744500 |
| C  | -3.87055200 | -1.33935300 | -0.01940600 |
| H  | -4.71027400 | -1.99668600 | 0.19179200  |
| C  | -3.40170000 | -2.89501500 | -1.91856400 |
| H  | -3.58156000 | -2.60586300 | -2.96131600 |
| H  | -4.27813500 | -3.42721600 | -1.53932200 |
| H  | -2.54126900 | -3.57537400 | -1.92224900 |
| C  | -4.76152100 | 0.05130500  | 1.85572100  |

|   |             |             |             |
|---|-------------|-------------|-------------|
| H | -4.25739100 | 0.15543000  | 2.82407600  |
| H | -5.51136900 | -0.74148300 | 1.92389600  |
| H | -5.26799100 | 1.00412300  | 1.65742800  |
| C | 1.58589000  | 1.25649000  | -1.72202000 |
| C | 0.38044400  | 3.09790800  | -0.54540100 |
| C | 1.51124000  | 2.54585300  | -1.16877200 |
| H | 2.38771500  | 3.18175600  | -1.26481000 |
| C | 0.45671700  | 4.50517500  | -0.03140200 |
| H | -0.40491600 | 5.07749600  | -0.39455800 |
| H | 1.37957100  | 5.01783800  | -0.31612800 |
| H | 0.38663300  | 4.48564600  | 1.06462300  |
| C | 2.86141100  | 0.82787100  | -2.38488100 |
| H | 3.61335900  | 1.62071500  | -2.42296500 |
| H | 2.64636600  | 0.48406800  | -3.40375800 |
| H | 3.27612500  | -0.03344800 | -1.84200300 |
| O | -0.27388300 | -0.92489000 | 1.16079700  |
| C | 0.86891500  | -0.69236000 | 1.67644500  |
| C | 1.03401900  | 1.11045100  | 2.15838200  |
| C | 0.91211900  | -0.03633300 | 3.04502600  |
| H | 0.13935100  | 1.62422300  | 1.80652500  |
| H | 2.00449400  | 1.52048300  | 1.88927400  |
| H | 1.78402100  | -0.28837600 | 3.64841000  |
| H | -0.04085500 | -0.14798900 | 3.56122800  |
| C | 2.10063900  | -1.21384500 | 1.04604200  |
| C | 1.96722400  | -2.07187600 | -0.05506100 |
| C | 3.38527500  | -0.91910600 | 1.52545000  |
| C | 3.08977000  | -2.62202500 | -0.65954500 |
| H | 0.97200500  | -2.30753800 | -0.42689400 |
| C | 4.50519600  | -1.46548400 | 0.91315900  |
| H | 3.52287400  | -0.25742900 | 2.37840700  |
| C | 4.36227500  | -2.31983800 | -0.17850600 |
| H | 2.97173800  | -3.29093400 | -1.50896700 |
| H | 5.49556900  | -1.22629600 | 1.29349600  |
| H | 5.24161600  | -2.75126700 | -0.65144100 |

**B1**

|    |             |             |             |
|----|-------------|-------------|-------------|
| Mn | -0.19231000 | -1.12066900 | -0.20740000 |
| O  | -1.61228200 | -1.77251900 | 1.21860700  |
| O  | 1.12387500  | -2.77347500 | -0.02109700 |
| O  | 1.20388600  | -0.39465100 | -1.62314300 |
| O  | -1.84218200 | -0.78232000 | -1.47175200 |
| C  | 2.38787800  | -2.67760300 | -0.15250200 |
| C  | 2.46028100  | -0.56705600 | -1.49363800 |
| C  | 3.06501900  | -1.62537400 | -0.79550100 |

|   |             |             |             |
|---|-------------|-------------|-------------|
| H | 4.15149100  | -1.66733500 | -0.80325200 |
| C | 3.33514600  | 0.44945600  | -2.16751100 |
| H | 3.16069200  | 0.42074600  | -3.25044900 |
| H | 4.40059600  | 0.29609700  | -1.97517800 |
| H | 3.04609500  | 1.45353600  | -1.82880300 |
| C | 3.19607000  | -3.79923200 | 0.43053100  |
| H | 2.94743800  | -3.91488900 | 1.49232300  |
| H | 4.27420500  | -3.65000800 | 0.32662100  |
| H | 2.91789500  | -4.73782800 | -0.06484700 |
| C | -3.06065100 | -0.65624600 | -1.12002000 |
| C | -2.86521900 | -1.54687700 | 1.20983000  |
| C | -3.58554000 | -0.98735900 | 0.13969400  |
| H | -4.65318900 | -0.84205100 | 0.28426300  |
| C | -3.61027800 | -1.92890200 | 2.45508400  |
| H | -3.50012900 | -3.00760000 | 2.62228500  |
| H | -4.67482500 | -1.68392400 | 2.41081700  |
| H | -3.15907000 | -1.42666600 | 3.31928700  |
| C | -3.98736000 | -0.10921800 | -2.16577600 |
| H | -5.01996300 | -0.01540300 | -1.81884900 |
| H | -3.96376100 | -0.75996300 | -3.04862000 |
| H | -3.62489500 | 0.87501300  | -2.48835700 |
| O | 0.91403000  | 0.06749800  | 1.37414600  |
| C | 1.25600900  | 1.24323000  | 1.19955300  |
| C | 2.66223300  | 2.95423800  | 2.38112600  |
| C | 2.63455600  | 1.68301100  | 1.61628000  |
| H | 1.95198200  | 3.12223600  | 3.18708700  |
| H | 3.47069900  | 3.66682400  | 2.24993800  |
| H | 3.22746800  | 1.77368000  | 0.69047000  |
| H | 3.07433200  | 0.83898500  | 2.17202900  |
| C | 0.33290500  | 2.20804000  | 0.56552300  |
| C | -1.03621800 | 1.91025200  | 0.53026700  |
| C | 0.79317500  | 3.39592400  | -0.01893000 |
| C | -1.92973000 | 2.77648800  | -0.08277200 |
| H | -1.39261800 | 0.99328900  | 1.00136600  |
| C | -0.10203000 | 4.25384500  | -0.64591400 |
| H | 1.85267800  | 3.64437400  | -0.00089600 |
| C | -1.46094500 | 3.94768800  | -0.67573900 |
| H | -2.99204000 | 2.54074700  | -0.09367500 |
| H | 0.26101200  | 5.16715200  | -1.11069000 |
| H | -2.15876600 | 4.62760800  | -1.15946900 |

**B2 (Quintet)**

|    |            |             |             |
|----|------------|-------------|-------------|
| Mn | 1.05900900 | 0.13213800  | -0.06996000 |
| O  | 1.72718500 | -1.34953500 | 1.21740600  |

|   |             |             |             |
|---|-------------|-------------|-------------|
| O | 1.22350400  | 1.58102400  | 1.40630900  |
| O | 0.40203500  | 1.59494000  | -1.33783300 |
| O | 3.03506400  | 0.11148500  | -0.84845000 |
| C | 0.64355400  | 2.71480000  | 1.39801800  |
| C | -0.10707600 | 2.71168400  | -0.98027400 |
| C | -0.04563400 | 3.26558400  | 0.30439900  |
| H | -0.50566300 | 4.23976600  | 0.44639600  |
| C | -0.80192500 | 3.47319300  | -2.06756800 |
| H | -0.09608600 | 3.66560700  | -2.88468000 |
| H | -1.22022200 | 4.42261800  | -1.72375700 |
| H | -1.60692000 | 2.85314700  | -2.48176600 |
| C | 0.74035600  | 3.50762800  | 2.66559400  |
| H | 0.36654800  | 2.90468100  | 3.50157000  |
| H | 0.18861700  | 4.45023300  | 2.62354700  |
| H | 1.79597900  | 3.72114400  | 2.87425500  |
| C | 3.86173100  | -0.85265900 | -0.76993500 |
| C | 2.72953200  | -2.12339900 | 1.05325600  |
| C | 3.74277800  | -1.95011000 | 0.10088600  |
| H | 4.53350000  | -2.69544000 | 0.07448100  |
| C | 2.79964700  | -3.29766800 | 1.98235000  |
| H | 2.81599500  | -2.93892100 | 3.01867200  |
| H | 3.67612900  | -3.92734300 | 1.80833500  |
| H | 1.89226700  | -3.90359200 | 1.86996300  |
| C | 5.05440500  | -0.77393900 | -1.67558500 |
| H | 5.73018400  | -1.62673900 | -1.56990300 |
| H | 5.60735500  | 0.14976000  | -1.46565300 |
| H | 4.71410000  | -0.71069400 | -2.71631400 |
| O | -1.07913400 | -0.30992200 | 0.62451800  |
| C | -1.78565200 | -0.77259900 | -0.28292200 |
| C | 0.35778000  | -1.27397600 | -1.47018900 |
| C | -1.13980100 | -1.13921200 | -1.58808000 |
| H | 0.91124000  | -1.03568700 | -2.38286600 |
| H | -1.41385600 | -0.34126400 | -2.29666600 |
| H | -1.59320900 | -2.05753100 | -1.98979200 |
| C | -3.23955200 | -0.91413700 | -0.08939400 |
| C | -3.78501300 | -0.61995600 | 1.16795100  |
| C | -4.08566200 | -1.31895500 | -1.12993400 |
| C | -5.14974600 | -0.73484100 | 1.38227500  |
| H | -3.12392600 | -0.30620700 | 1.97207700  |
| C | -5.45354900 | -1.42487000 | -0.91385200 |
| H | -3.68185100 | -1.54359000 | -2.11429900 |
| C | -5.98499500 | -1.13664400 | 0.34065600  |
| H | -5.56695100 | -0.51078600 | 2.36110600  |
| H | -6.10699300 | -1.73487800 | -1.72556900 |

|   |             |             |             |
|---|-------------|-------------|-------------|
| H | -7.05610800 | -1.22544100 | 0.50879900  |
| H | 0.68835900  | -2.21577000 | -1.02043200 |

**B2 (Triplet)**

|    |             |             |             |
|----|-------------|-------------|-------------|
| Mn | 0.92908000  | -0.07171100 | -0.22822800 |
| O  | 1.37755600  | -1.61905800 | 0.90271400  |
| O  | 1.34182800  | 1.14180400  | 1.39602100  |
| O  | 0.41874400  | 1.49679500  | -1.28938100 |
| O  | 2.72044700  | 0.05454500  | -1.00265200 |
| C  | 0.92700800  | 2.34138900  | 1.51055000  |
| C  | 0.12917700  | 2.65423700  | -0.83095700 |
| C  | 0.30813900  | 3.08190900  | 0.49069200  |
| H  | 0.01286100  | 4.10132500  | 0.72419500  |
| C  | -0.42274400 | 3.61209400  | -1.84193800 |
| H  | 0.32235400  | 3.77841000  | -2.62958300 |
| H  | -0.69683000 | 4.57550200  | -1.40472400 |
| H  | -1.30316300 | 3.16914900  | -2.32298400 |
| C  | 1.15151500  | 2.98802300  | 2.84335800  |
| H  | 0.67239400  | 2.38595900  | 3.62477400  |
| H  | 0.76770100  | 4.01041100  | 2.89105000  |
| H  | 2.22604400  | 2.99833300  | 3.06348400  |
| C  | 3.69677500  | -0.71572700 | -0.70035900 |
| C  | 2.53467700  | -2.15410500 | 0.96836800  |
| C  | 3.65628200  | -1.76469600 | 0.22486400  |
| H  | 4.57363400  | -2.32579600 | 0.37880900  |
| C  | 2.65360800  | -3.29551600 | 1.92822500  |
| H  | 2.37090600  | -2.95527000 | 2.93155600  |
| H  | 3.66101700  | -3.71716000 | 1.96193100  |
| H  | 1.94251900  | -4.08131500 | 1.64613200  |
| C  | 4.97335200  | -0.43039900 | -1.42565800 |
| H  | 5.78752500  | -1.09288200 | -1.12217000 |
| H  | 5.26753500  | 0.61060700  | -1.24680400 |
| H  | 4.80774200  | -0.53442400 | -2.50472800 |
| O  | -0.99193200 | -0.24906300 | 0.40272600  |
| C  | -1.80932800 | -0.69165000 | -0.43176700 |
| C  | 0.22844000  | -1.25367200 | -1.73271000 |
| C  | -1.28265800 | -1.10828700 | -1.76614700 |
| H  | 0.71338100  | -0.92454500 | -2.65751300 |
| H  | -1.59016200 | -0.31101100 | -2.46304000 |
| H  | -1.79764800 | -2.01444700 | -2.11484500 |
| C  | -3.23749500 | -0.72917200 | -0.10134700 |
| C  | -3.65940000 | -0.33024600 | 1.17562000  |
| C  | -4.19016300 | -1.12707800 | -1.04957700 |
| C  | -5.00765900 | -0.33065600 | 1.49646900  |

|   |             |             |             |
|---|-------------|-------------|-------------|
| H | -2.91882400 | -0.02219700 | 1.90939000  |
| C | -5.54000900 | -1.12005900 | -0.72520200 |
| H | -3.88187500 | -1.43462000 | -2.04593100 |
| C | -5.94894300 | -0.72386800 | 0.54574700  |
| H | -5.32971400 | -0.02218800 | 2.48809800  |
| H | -6.27548800 | -1.42493400 | -1.46545900 |
| H | -7.00717400 | -0.72095500 | 0.79756700  |
| H | 0.55166000  | -2.27050100 | -1.47831400 |

**B2 (Singlet)**

|    |             |             |             |
|----|-------------|-------------|-------------|
| Mn | 1.02969600  | -0.05592500 | -0.20486200 |
| O  | 1.30376900  | -1.74056600 | 0.63324100  |
| O  | 1.05372300  | 0.95598200  | 1.47056400  |
| O  | 0.71485600  | 1.78323900  | -1.08655300 |
| O  | 2.85529700  | 0.16232600  | -0.73218500 |
| C  | 0.61684500  | 2.11727200  | 1.77375900  |
| C  | 0.25953200  | 2.83539700  | -0.54128700 |
| C  | 0.13202700  | 3.03510700  | 0.84325100  |
| H  | -0.24491700 | 3.98880300  | 1.20114600  |
| C  | -0.12643800 | 3.94056500  | -1.47795700 |
| H  | 0.74980900  | 4.24769600  | -2.06155300 |
| H  | -0.53134700 | 4.81305500  | -0.95824600 |
| H  | -0.87152100 | 3.56783700  | -2.19152100 |
| C  | 0.67601100  | 2.47013700  | 3.22617900  |
| H  | 0.14161200  | 1.71390700  | 3.81303000  |
| H  | 0.25140600  | 3.45606300  | 3.43253700  |
| H  | 1.72079800  | 2.45589700  | 3.56020700  |
| C  | 3.78138200  | -0.70595000 | -0.56376500 |
| C  | 2.42010500  | -2.38020200 | 0.65970100  |
| C  | 3.61511500  | -1.93109900 | 0.09485700  |
| H  | 4.48411100  | -2.57800400 | 0.17814800  |
| C  | 2.37431600  | -3.70212800 | 1.35525700  |
| H  | 2.06148700  | -3.55643500 | 2.39627800  |
| H  | 3.33821000  | -4.21674400 | 1.34063500  |
| H  | 1.61875300  | -4.33994800 | 0.88091800  |
| C  | 5.11597700  | -0.33717500 | -1.12763800 |
| H  | 5.86596100  | -1.11672600 | -0.97279000 |
| H  | 5.46523800  | 0.59338700  | -0.66421500 |
| H  | 5.01734000  | -0.14158700 | -2.20214800 |
| O  | -0.95195700 | -0.32454000 | 0.33748200  |
| C  | -1.77873400 | -0.50224000 | -0.57457200 |
| C  | 0.24809600  | -0.59894700 | -1.95045300 |
| C  | -1.26099100 | -0.48863800 | -1.97421700 |
| H  | 0.72564100  | -0.07444700 | -2.78427000 |

|   |             |             |             |
|---|-------------|-------------|-------------|
| H | -1.57818900 | 0.47521900  | -2.40647300 |
| H | -1.75652900 | -1.25948600 | -2.58113800 |
| C | -3.20169600 | -0.67511000 | -0.25347500 |
| C | -3.59944600 | -0.75074900 | 1.08914800  |
| C | -4.16807200 | -0.75238700 | -1.26480800 |
| C | -4.93849100 | -0.90561700 | 1.41241100  |
| H | -2.84651600 | -0.69224200 | 1.87131800  |
| C | -5.50922000 | -0.89993900 | -0.93618400 |
| H | -3.87729500 | -0.68922400 | -2.31077800 |
| C | -5.89430300 | -0.97942000 | 0.39978500  |
| H | -5.24146800 | -0.96925600 | 2.45476500  |
| H | -6.25657600 | -0.95522800 | -1.72385500 |
| H | -6.94497800 | -1.10003200 | 0.65463200  |
| H | 0.58898400  | -1.64916400 | -1.92542400 |

**TS<sub>B2</sub>**

|    |             |             |             |
|----|-------------|-------------|-------------|
| Mn | 0.54190000  | 1.42257100  | 0.09229700  |
| O  | -0.62179200 | 1.81107000  | -1.61428400 |
| O  | 1.88044600  | 3.05411200  | -0.16103100 |
| O  | 1.70260400  | 0.98480000  | 1.81220600  |
| O  | -1.20826500 | 1.88621800  | 1.21391100  |
| C  | 3.10389600  | 3.02957500  | 0.19465700  |
| C  | 2.95797300  | 1.19258000  | 1.88486800  |
| C  | 3.66607800  | 2.14098000  | 1.12839800  |
| H  | 4.73306200  | 2.23055500  | 1.31690100  |
| C  | 3.70790500  | 0.34544100  | 2.87003800  |
| H  | 3.27666000  | 0.47702300  | 3.86990500  |
| H  | 4.77706500  | 0.57111200  | 2.90755600  |
| H  | 3.57423900  | -0.71135400 | 2.60396100  |
| C  | 3.99626300  | 4.04737000  | -0.45325600 |
| H  | 3.98457800  | 3.89753800  | -1.54002200 |
| H  | 5.02917200  | 4.00199000  | -0.09767700 |
| H  | 3.59619500  | 5.05151200  | -0.26736700 |
| C  | -2.40242000 | 1.88499000  | 0.77062800  |
| C  | -1.89460500 | 1.81626400  | -1.68223100 |
| C  | -2.77133200 | 1.84003900  | -0.58555100 |
| H  | -3.83660200 | 1.84034000  | -0.80643400 |
| C  | -2.47309100 | 1.78881300  | -3.06677100 |
| H  | -2.05122700 | 2.61337000  | -3.65406600 |
| H  | -3.56463800 | 1.85744100  | -3.07944400 |
| H  | -2.16914100 | 0.85732200  | -3.56255500 |
| C  | -3.48607100 | 1.93277300  | 1.80832400  |
| H  | -4.48961000 | 2.01074700  | 1.38002600  |
| H  | -3.31047500 | 2.78316400  | 2.47825800  |



|           |             |             |             |
|-----------|-------------|-------------|-------------|
| H         | -3.43216700 | 1.02420800  | 2.42364300  |
| O         | 1.98894900  | 0.03538700  | -1.06349100 |
| C         | 2.13676400  | -1.14759600 | -0.73773100 |
| C         | -0.25180200 | -1.13200900 | 0.06946300  |
| C         | 0.99561500  | -1.92118900 | -0.11775900 |
| H         | -0.49261900 | -0.71312300 | 1.04448600  |
| H         | 1.34981900  | -2.33558100 | 0.83750200  |
| H         | 0.81545400  | -2.79367800 | -0.76788600 |
| C         | 3.43779100  | -1.81651700 | -0.93529000 |
| C         | 4.52973200  | -1.05274000 | -1.37043300 |
| C         | 3.61114900  | -3.18369600 | -0.68262900 |
| C         | 5.77034000  | -1.64595200 | -1.55044300 |
| H         | 4.39279000  | 0.00978400  | -1.55882400 |
| C         | 4.85352100  | -3.77517700 | -0.86943300 |
| H         | 2.77736400  | -3.79439400 | -0.34527800 |
| C         | 5.93239000  | -3.00798000 | -1.30178800 |
| H         | 6.61494900  | -1.04813800 | -1.88450400 |
| H         | 4.98107000  | -4.83752700 | -0.67626800 |
| H         | 6.90520000  | -3.47343100 | -1.44463600 |
| H         | -0.79243300 | -0.75326900 | -0.79648800 |
| C         | -1.92098300 | -2.79016000 | 0.39781500  |
| H         | -1.28245100 | -3.26110700 | 1.14232500  |
| C         | -3.01599100 | -2.06771000 | 0.76483700  |
| C         | -4.00883400 | -1.50574100 | -0.15273200 |
| C         | -3.80817300 | -1.54431200 | -1.54278900 |
| C         | -5.17079500 | -0.88746900 | 0.33403100  |
| C         | -4.74217900 | -0.99351900 | -2.40965800 |
| H         | -2.90749700 | -1.99627300 | -1.95429300 |
| C         | -6.10062600 | -0.33261700 | -0.53756500 |
| H         | -5.34655600 | -0.84510800 | 1.40641400  |
| C         | -5.89260700 | -0.38151500 | -1.91353000 |
| H         | -4.56508900 | -1.03344900 | -3.48269100 |
| H         | -6.99475000 | 0.14033000  | -0.13655100 |
| H         | -6.62007600 | 0.05343400  | -2.59531600 |
| N         | -3.23754200 | -1.68495400 | 2.11775200  |
| N         | -2.39561300 | -1.99722800 | 2.95470600  |
| N         | -1.67715200 | -2.23165200 | 3.80896100  |
| H         | -1.82263200 | -3.16110200 | -0.61736900 |
| <b>C1</b> |             |             |             |
| Mn        | -0.67489100 | -1.49133400 | -0.21773000 |
| O         | 0.82852300  | -1.45554800 | -1.68734300 |
| O         | -2.13586500 | -2.79549400 | -0.95447000 |
| O         | -2.07465600 | -0.91227000 | 1.25666900  |

|   |             |             |             |
|---|-------------|-------------|-------------|
| O | 0.74137800  | -2.34162100 | 1.07298000  |
| C | -3.39203700 | -2.66173800 | -0.77070500 |
| C | -3.33694500 | -1.00533700 | 1.11387800  |
| C | -3.99697100 | -1.81332300 | 0.17077200  |
| H | -5.08421100 | -1.79428100 | 0.18623200  |
| C | -4.16579100 | -0.18408500 | 2.05825800  |
| H | -4.02070300 | -0.55219700 | 3.08193000  |
| H | -5.23408100 | -0.20551300 | 1.82416000  |
| H | -3.80989400 | 0.85476400  | 2.03896300  |
| C | -4.27098300 | -3.49646300 | -1.65400600 |
| H | -4.07298600 | -3.24410900 | -2.70316200 |
| H | -5.33657200 | -3.36305100 | -1.44941500 |
| H | -4.01069600 | -4.55444800 | -1.52804800 |
| C | 2.00469200  | -2.36719000 | 0.89854700  |
| C | 2.08144800  | -1.53535600 | -1.46525600 |
| C | 2.67634200  | -1.97041200 | -0.26936100 |
| H | 3.76301900  | -2.00793800 | -0.24756200 |
| C | 2.97379700  | -1.11088000 | -2.59497300 |
| H | 2.70866400  | -1.66565600 | -3.50304200 |
| H | 4.03729600  | -1.25274800 | -2.38060700 |
| H | 2.79510800  | -0.04787200 | -2.80848600 |
| C | 2.81539800  | -2.88458100 | 2.05116200  |
| H | 3.88949200  | -2.72046300 | 1.92650600  |
| H | 2.63722500  | -3.96307400 | 2.15378000  |
| H | 2.47673200  | -2.42089700 | 2.98627500  |
| O | -1.45558600 | 0.55243300  | -1.25828200 |
| C | -1.70849600 | 1.54379500  | -0.56576300 |
| C | 0.69275300  | 1.48374700  | 0.22812600  |
| C | -0.63615500 | 2.20920900  | 0.25164000  |
| H | 0.56682300  | 0.49316900  | 0.69364100  |
| H | -0.99956000 | 2.30604300  | 1.28650800  |
| H | -0.52756100 | 3.24248100  | -0.11575100 |
| C | -3.08652600 | 2.08253000  | -0.51014900 |
| C | -4.09843700 | 1.41945700  | -1.21723700 |
| C | -3.41502300 | 3.19919300  | 0.27053700  |
| C | -5.41457000 | 1.84973700  | -1.12886600 |
| H | -3.84024500 | 0.55918800  | -1.83009900 |
| C | -4.73274300 | 3.63044300  | 0.35420600  |
| H | -2.64632800 | 3.73508800  | 0.82187500  |
| C | -5.73332000 | 2.95268800  | -0.33853600 |
| H | -6.19543800 | 1.32542800  | -1.67483500 |
| H | -4.98088900 | 4.49542900  | 0.96455100  |
| H | -6.76565500 | 3.28781800  | -0.26495500 |
| H | 1.02015000  | 1.30741900  | -0.80592300 |

|   |            |             |             |
|---|------------|-------------|-------------|
| C | 1.79211300 | 2.23238300  | 0.98641800  |
| H | 1.43872700 | 2.47752600  | 1.99982600  |
| C | 3.03645300 | 1.41201500  | 1.07575400  |
| C | 4.08355200 | 1.41186500  | 0.10407200  |
| C | 4.01788400 | 2.25346000  | -1.03237300 |
| C | 5.20639600 | 0.55495100  | 0.22212800  |
| C | 5.01979400 | 2.23626800  | -1.99031300 |
| H | 3.16902900 | 2.92021700  | -1.16720100 |
| C | 6.19991000 | 0.54651900  | -0.74201200 |
| H | 5.28508200 | -0.10204100 | 1.08578000  |
| C | 6.11727900 | 1.38461900  | -1.85737200 |
| H | 4.94272600 | 2.89336000  | -2.85424100 |
| H | 7.05177700 | -0.12066700 | -0.62573100 |
| H | 6.90007200 | 1.37369300  | -2.61234800 |
| N | 3.15354400 | 0.47457500  | 2.09503700  |
| N | 2.24593400 | 0.33063300  | 2.91474500  |
| N | 1.47301700 | 0.08226000  | 3.72401300  |
| H | 1.99849100 | 3.19334300  | 0.50016100  |

**TS<sub>c1</sub>**

|    |             |             |             |
|----|-------------|-------------|-------------|
| Mn | -1.54384500 | 0.83684100  | -0.01767600 |
| O  | -1.35282800 | 1.32933500  | 2.02790300  |
| O  | -3.04090300 | -0.59813000 | 0.49949500  |
| O  | -2.63384800 | 1.01249000  | -1.84459000 |
| O  | -1.04653900 | 2.87757300  | -0.35666300 |
| C  | -3.72877100 | -1.28316400 | -0.32479200 |
| C  | -3.35068700 | 0.10192600  | -2.37162900 |
| C  | -3.87314900 | -1.01256000 | -1.69644300 |
| H  | -4.49257900 | -1.69560200 | -2.27256700 |
| C  | -3.66397100 | 0.27389800  | -3.82979600 |
| H  | -4.17453300 | 1.23304600  | -3.98024200 |
| H  | -4.28641200 | -0.52898500 | -4.23420700 |
| H  | -2.72671600 | 0.32152600  | -4.39783100 |
| C  | -4.44128000 | -2.47868000 | 0.23962400  |
| H  | -3.70280600 | -3.24752400 | 0.50327200  |
| H  | -5.16231400 | -2.91445200 | -0.45747800 |
| H  | -4.95339200 | -2.19719700 | 1.16716500  |
| C  | -0.53706400 | 3.70575500  | 0.46406300  |
| C  | -0.80714300 | 2.35619700  | 2.54750600  |
| C  | -0.41106700 | 3.50789500  | 1.84966600  |
| H  | 0.04020700  | 4.31014800  | 2.42837300  |
| C  | -0.55868500 | 2.28791300  | 4.02615000  |
| H  | -1.46003200 | 1.92852600  | 4.53595900  |
| H  | -0.25357300 | 3.24659800  | 4.45473700  |

|   |             |             |             |
|---|-------------|-------------|-------------|
| H | 0.23423200  | 1.55264400  | 4.21955800  |
| C | -0.02426000 | 4.98600300  | -0.12761700 |
| H | 0.37682300  | 5.67532600  | 0.62059100  |
| H | -0.83020400 | 5.48297700  | -0.68102200 |
| H | 0.76350900  | 4.75145000  | -0.85571400 |
| O | -0.19162100 | -0.70094200 | -0.93274700 |
| C | 0.92359100  | -0.64038000 | -1.46411100 |
| C | 2.76921200  | -2.36606900 | -1.93888700 |
| C | 1.39986800  | -1.78949100 | -2.30730200 |
| H | 3.08325800  | -3.03218500 | -2.75036700 |
| H | 1.44512400  | -1.42220100 | -3.34350300 |
| H | 0.62347200  | -2.56352800 | -2.27698900 |
| C | 1.79445100  | 0.53752400  | -1.26912500 |
| C | 1.72237400  | 1.23823400  | -0.05862900 |
| C | 2.70430800  | 0.94800000  | -2.25235500 |
| C | 2.54930700  | 2.33082600  | 0.16757400  |
| H | 1.02763400  | 0.90122900  | 0.71178700  |
| C | 3.50878200  | 2.05965100  | -2.03386100 |
| H | 2.76580700  | 0.41691100  | -3.20017800 |
| C | 3.43627000  | 2.74696500  | -0.82403100 |
| H | 2.49607200  | 2.86306200  | 1.11504200  |
| H | 4.19807100  | 2.38823200  | -2.80776800 |
| H | 4.07794800  | 3.60795800  | -0.65012000 |
| H | 3.51386400  | -1.56195200 | -1.89743000 |
| C | 2.80649600  | -3.18473400 | -0.64218900 |
| H | 3.83487400  | -3.53470400 | -0.48946000 |
| C | 2.40397800  | -2.40942900 | 0.58446600  |
| C | 1.06928600  | -2.59935600 | 1.20673400  |
| C | 0.21327400  | -3.63473100 | 0.81272200  |
| C | 0.62831100  | -1.70585100 | 2.19847000  |
| C | -1.04051700 | -3.77909500 | 1.39825100  |
| H | 0.51134400  | -4.34801700 | 0.05016300  |
| C | -0.62233800 | -1.85115200 | 2.77846400  |
| H | 1.27551000  | -0.88724600 | 2.50663800  |
| C | -1.46369300 | -2.88931300 | 2.37913900  |
| H | -1.68612500 | -4.59669000 | 1.08419300  |
| H | -0.94944200 | -1.14541800 | 3.53931700  |
| H | -2.44758400 | -2.99921100 | 2.83096300  |
| N | 3.14505700  | -1.50932000 | 1.13837600  |
| N | 4.51794100  | -1.39912200 | 0.45238000  |
| N | 5.04497600  | -0.37088000 | 0.33937000  |
| H | 2.18288000  | -4.07378600 | -0.76140000 |

**D2**

|    |             |             |             |
|----|-------------|-------------|-------------|
| O  | 1.92634100  | 2.29995900  | 1.45196300  |
| C  | 2.34654600  | 2.35990400  | 0.29890900  |
| C  | 1.12954100  | 3.63412200  | -1.59708400 |
| C  | 2.19146000  | 3.63734300  | -0.48875100 |
| H  | 1.22035500  | 4.59367800  | -2.11978300 |
| H  | 3.16043800  | 3.89872500  | -0.93414500 |
| H  | 1.94370500  | 4.41962700  | 0.23967700  |
| C  | 3.03114100  | 1.19070100  | -0.31729400 |
| C  | 3.09347000  | -0.00623600 | 0.40726100  |
| C  | 3.56957900  | 1.23356400  | -1.60792600 |
| C  | 3.66080700  | -1.14185700 | -0.15500000 |
| H  | 2.68586800  | -0.03615800 | 1.41735900  |
| C  | 4.13800700  | 0.09573300  | -2.17035300 |
| H  | 3.54838300  | 2.15506300  | -2.18546100 |
| C  | 4.17818000  | -1.09446200 | -1.44864300 |
| H  | 3.70008800  | -2.06814200 | 0.41511300  |
| H  | 4.55171100  | 0.13904300  | -3.17519500 |
| H  | 4.62040400  | -1.98459300 | -1.89101800 |
| H  | 1.34468800  | 2.85665200  | -2.34139200 |
| C  | -0.31096600 | 3.50448600  | -1.12210500 |
| H  | -0.99986200 | 3.90503600  | -1.87924000 |
| C  | -0.78817100 | 2.10511200  | -0.80498600 |
| C  | -2.23610600 | 1.93358300  | -0.49579700 |
| C  | -2.85747100 | 2.69952500  | 0.49432800  |
| C  | -2.97858300 | 0.99750100  | -1.22043600 |
| C  | -4.20830600 | 2.51216200  | 0.76776200  |
| H  | -2.28018500 | 3.42550600  | 1.06463500  |
| C  | -4.33350500 | 0.82910000  | -0.95684800 |
| H  | -2.48942900 | 0.40874300  | -1.99624400 |
| C  | -4.94788700 | 1.58164300  | 0.04086100  |
| H  | -4.68668200 | 3.09878700  | 1.54885100  |
| H  | -4.90992300 | 0.10855600  | -1.53376600 |
| H  | -6.00654800 | 1.44560300  | 0.25083300  |
| N  | 0.01448500  | 1.12779100  | -0.83694100 |
| H  | -0.47984900 | 4.11499200  | -0.21992200 |
| Mn | -0.13798300 | -0.64940400 | 0.08302300  |
| O  | -0.38376700 | 0.29961100  | 1.87998100  |
| O  | 0.18860000  | -1.57128900 | -1.70957100 |
| O  | -2.04188000 | -1.59157500 | 0.15696700  |
| O  | 0.76637500  | -2.23378200 | 1.10111200  |
| C  | 0.11178000  | -0.04647300 | 3.00465500  |
| C  | 1.09868900  | -2.24367400 | 2.33113200  |
| C  | 0.82976500  | -1.22321800 | 3.25900800  |
| H  | 1.17999800  | -1.37524000 | 4.27649900  |

|   |             |             |             |
|---|-------------|-------------|-------------|
| C | -0.11247400 | 0.92443400  | 4.12310300  |
| H | 0.27283700  | 0.56828400  | 5.08186200  |
| H | -1.18547100 | 1.13040000  | 4.21599900  |
| H | 0.37473600  | 1.87467400  | 3.87014200  |
| C | 1.84161000  | -3.46023500 | 2.79434400  |
| H | 1.24665100  | -4.35437200 | 2.57301800  |
| H | 2.07550400  | -3.43817300 | 3.86177400  |
| H | 2.77550000  | -3.55197100 | 2.22509700  |
| C | -2.41218500 | -2.54442800 | -0.59667300 |
| C | -0.47824600 | -2.55023900 | -2.19334100 |
| C | -1.69355500 | -3.04124000 | -1.70190700 |
| H | -2.14008600 | -3.87051500 | -2.24431800 |
| C | 0.12338000  | -3.18858700 | -3.40880900 |
| H | 0.20732000  | -2.44057600 | -4.20681600 |
| H | -0.45622000 | -4.03951300 | -3.77604600 |
| H | 1.14280900  | -3.51891500 | -3.17477100 |
| C | -3.73439400 | -3.16837800 | -0.26228100 |
| H | -4.01732000 | -3.97168600 | -0.94753600 |
| H | -4.51008200 | -2.39226400 | -0.27492100 |
| H | -3.69913400 | -3.56338300 | 0.76032100  |

#### D1

|    |             |             |             |
|----|-------------|-------------|-------------|
| Mn | -0.32692200 | 1.32952900  | 0.70541000  |
| O  | -0.35867400 | -0.44742600 | 1.84449200  |
| O  | -2.40834000 | 1.45506500  | 0.38895800  |
| O  | -0.28811900 | 3.33595200  | -0.06220800 |
| O  | 1.03224400  | 2.02795700  | 2.19328100  |
| C  | -2.97018100 | 2.16268500  | -0.51088800 |
| C  | -1.12034100 | 3.79835500  | -0.90544700 |
| C  | -2.38957700 | 3.25499600  | -1.17473000 |
| H  | -3.00016400 | 3.76528400  | -1.91555900 |
| C  | -0.69645100 | 5.03505900  | -1.64323300 |
| H  | 0.23747800  | 4.83348600  | -2.18200300 |
| H  | -0.47998200 | 5.83085400  | -0.92000400 |
| H  | -1.44864000 | 5.39247600  | -2.35171200 |
| C  | -4.37957900 | 1.77998000  | -0.86060500 |
| H  | -4.39089600 | 0.76051200  | -1.26928800 |
| H  | -4.83893600 | 2.45515200  | -1.58773900 |
| H  | -4.98942200 | 1.76506000  | 0.05102600  |
| C  | 1.75328700  | 1.30667000  | 2.95577100  |
| C  | 0.57218100  | -0.86776400 | 2.60647100  |
| C  | 1.58176200  | -0.07041300 | 3.17221200  |
| H  | 2.29335200  | -0.56292700 | 3.83049500  |
| C  | 0.58120600  | -2.34029200 | 2.88946900  |

|   |             |             |             |
|---|-------------|-------------|-------------|
| H | 1.32040800  | -2.62716500 | 3.64251700  |
| H | 0.80356300  | -2.87157700 | 1.95184800  |
| H | -0.41615800 | -2.66477100 | 3.21001600  |
| C | 2.88802100  | 2.00764900  | 3.64388700  |
| H | 3.44924100  | 1.35619200  | 4.31955000  |
| H | 2.50123300  | 2.86530300  | 4.20725700  |
| H | 3.57249700  | 2.40886100  | 2.88520300  |
| O | 0.27756000  | 0.54828300  | -1.29648900 |
| C | 1.12829300  | 0.00560900  | -2.01407200 |
| C | 0.37958900  | -1.88651100 | -3.52788900 |
| C | 0.73232600  | -0.39629300 | -3.40486800 |
| H | 0.15337600  | -2.07417800 | -4.58337700 |
| H | 1.53039000  | -0.15227200 | -4.11436000 |
| H | -0.14712900 | 0.20208700  | -3.67154300 |
| C | 2.49294100  | -0.27158100 | -1.52138100 |
| C | 2.78717900  | -0.06757600 | -0.16685400 |
| C | 3.49581000  | -0.76278700 | -2.36826000 |
| C | 4.04982700  | -0.34500100 | 0.33243200  |
| H | 2.01255800  | 0.29679400  | 0.50183000  |
| C | 4.76362100  | -1.03371400 | -1.86852400 |
| H | 3.29655900  | -0.93292700 | -3.42336200 |
| C | 5.04244000  | -0.82644700 | -0.52043700 |
| H | 4.25908300  | -0.19264300 | 1.38991400  |
| H | 5.53637700  | -1.41031200 | -2.53419100 |
| H | 6.03497100  | -1.04357800 | -0.13183000 |
| H | 1.24782100  | -2.51065600 | -3.27712400 |
| C | -0.82594300 | -2.29834300 | -2.69460100 |
| H | -1.27342600 | -3.21839800 | -3.09759000 |
| C | -0.54799400 | -2.59269900 | -1.23570100 |
| C | -1.69810000 | -2.69030100 | -0.29257900 |
| C | -2.70681300 | -1.72408900 | -0.30158100 |
| C | -1.72915100 | -3.71667900 | 0.65644400  |
| C | -3.72830600 | -1.77679800 | 0.64121300  |
| H | -2.67621500 | -0.90559800 | -1.02035700 |
| C | -2.76069400 | -3.77445900 | 1.58597200  |
| H | -0.94385500 | -4.47064900 | 0.65346600  |
| C | -3.75761800 | -2.80109700 | 1.58394300  |
| H | -4.50213500 | -1.01151800 | 0.64076200  |
| H | -2.78549600 | -4.58032000 | 2.31640200  |
| H | -4.56103600 | -2.84329700 | 2.31617000  |
| N | 0.61843100  | -2.79556800 | -0.79915000 |
| H | -1.61516400 | -1.53610300 | -2.75887800 |

**TS<sub>D2</sub>**

|    |             |             |             |
|----|-------------|-------------|-------------|
| O  | -2.01736300 | 1.06231700  | -2.17584300 |
| C  | -1.71778300 | 1.74726600  | -1.14973100 |
| C  | -0.44624800 | 3.96278200  | -0.59208100 |
| C  | -1.49741200 | 3.24296800  | -1.41202400 |
| H  | -0.46775400 | 5.03447800  | -0.82465300 |
| H  | -2.48162900 | 3.71876100  | -1.28868000 |
| H  | -1.23828000 | 3.31935600  | -2.47846500 |
| C  | -2.49571500 | 1.43015400  | 0.12338000  |
| C  | -3.75988500 | 0.85542900  | -0.03659500 |
| C  | -2.05097400 | 1.70422200  | 1.42040500  |
| C  | -4.55788000 | 0.55635600  | 1.06388400  |
| H  | -4.10934200 | 0.63673800  | -1.04351300 |
| C  | -2.84326200 | 1.39971300  | 2.52452100  |
| H  | -1.06102200 | 2.12615800  | 1.58021800  |
| C  | -4.10028600 | 0.82576900  | 2.35113100  |
| H  | -5.53785800 | 0.10562400  | 0.91523100  |
| H  | -2.47302200 | 1.60948500  | 3.52642600  |
| H  | -4.71775700 | 0.58683900  | 3.21486000  |
| H  | -0.65733800 | 3.87674600  | 0.48220500  |
| C  | 0.93249800  | 3.41490600  | -0.89841600 |
| H  | 1.70002300  | 3.87780600  | -0.26464100 |
| C  | 1.03197000  | 1.91911200  | -0.74212000 |
| C  | 2.40824500  | 1.34715200  | -0.73427900 |
| C  | 2.71888800  | 0.26422500  | -1.56555700 |
| C  | 3.40451700  | 1.88374900  | 0.09006600  |
| C  | 3.99867200  | -0.28072800 | -1.55976600 |
| H  | 1.95011800  | -0.14336100 | -2.22169500 |
| C  | 4.67786500  | 1.32510400  | 0.10589200  |
| H  | 3.17864300  | 2.72587300  | 0.74209000  |
| C  | 4.97779800  | 0.24365900  | -0.71914000 |
| H  | 4.23238400  | -1.11448800 | -2.21859700 |
| H  | 5.43873500  | 1.73734800  | 0.76511100  |
| H  | 5.97699800  | -0.18656000 | -0.71213600 |
| N  | -0.01200100 | 1.18537100  | -0.64379300 |
| H  | 1.22574700  | 3.65367600  | -1.93376300 |
| Mn | 0.06424100  | -0.72674300 | -0.00741000 |
| O  | -0.44798100 | -1.46198900 | -1.71541500 |
| O  | 0.73363100  | -0.07577800 | 1.68688900  |
| O  | 1.41056100  | -2.29303000 | 0.12454200  |
| O  | -1.53625200 | -1.69467200 | 0.90378800  |
| C  | -1.54403800 | -2.07522900 | -2.00969700 |
| C  | -2.47305300 | -2.29044600 | 0.28688300  |
| C  | -2.52767900 | -2.46905500 | -1.11067400 |
| H  | -3.39178500 | -2.98858000 | -1.51559800 |



|   |             |             |             |
|---|-------------|-------------|-------------|
| C | -1.71266400 | -2.34834900 | -3.46873800 |
| H | -2.59718500 | -2.95332900 | -3.68164200 |
| H | -0.82024300 | -2.85304600 | -3.85602000 |
| H | -1.79663300 | -1.39030800 | -3.99766000 |
| C | -3.56611300 | -2.87822700 | 1.12318300  |
| H | -3.26937700 | -3.88956100 | 1.43184400  |
| H | -4.50661400 | -2.95930400 | 0.57000700  |
| H | -3.71339900 | -2.28160500 | 2.02886600  |
| C | 2.48947200  | -2.25539800 | 0.79824400  |
| C | 1.89983100  | -0.29838200 | 2.18973300  |
| C | 2.78307600  | -1.28987100 | 1.77761100  |
| H | 3.73976100  | -1.35650400 | 2.28801400  |
| C | 2.26163600  | 0.59721500  | 3.32963200  |
| H | 2.05636000  | 1.63937500  | 3.05822800  |
| H | 3.30938900  | 0.49054900  | 3.62291600  |
| H | 1.62635600  | 0.35781500  | 4.19187100  |
| C | 3.47689200  | -3.34734100 | 0.53494400  |
| H | 4.46675600  | -3.11946600 | 0.94017200  |
| H | 3.54857400  | -3.52968300 | -0.54261400 |
| H | 3.11640500  | -4.27517100 | 0.99757300  |

**TS<sub>D2'</sub>**

|   |             |             |             |
|---|-------------|-------------|-------------|
| O | 3.15118000  | -3.25069200 | 0.30865600  |
| C | 2.80592100  | -2.38463700 | -0.50010900 |
| C | 0.67652100  | -3.71063000 | -1.01883000 |
| C | 1.55664400  | -2.52154800 | -1.26725800 |
| H | 1.02909600  | -4.59744800 | -1.56438000 |
| H | 1.62638500  | -2.20359000 | -2.31387900 |
| H | 0.77632700  | -1.61308300 | -0.80522000 |
| C | 3.61099000  | -1.14715100 | -0.67911100 |
| C | 4.85870900  | -1.06665000 | -0.05104900 |
| C | 3.13720000  | -0.04501100 | -1.40288600 |
| C | 5.62435800  | 0.08661100  | -0.15132700 |
| H | 5.21521300  | -1.92237600 | 0.51813900  |
| C | 3.90148100  | 1.11249100  | -1.49597200 |
| H | 2.15972000  | -0.07489900 | -1.88410500 |
| C | 5.14579600  | 1.17843200  | -0.87382600 |
| H | 6.59499400  | 0.13888400  | 0.33663600  |
| H | 3.52149700  | 1.96614600  | -2.05303900 |
| H | 5.74332500  | 2.08438100  | -0.94939600 |
| H | 0.70597900  | -3.96443600 | 0.04973500  |
| C | -0.75534800 | -3.40539600 | -1.43730500 |
| H | -1.43531900 | -4.20860800 | -1.13528900 |
| C | -1.25373300 | -2.08662300 | -0.87261800 |

|    |             |             |             |
|----|-------------|-------------|-------------|
| C  | -2.71441100 | -1.88834400 | -0.70858600 |
| C  | -3.61491200 | -2.59575000 | -1.51267200 |
| C  | -3.20474400 | -0.97331900 | 0.23148700  |
| C  | -4.98192400 | -2.37396300 | -1.39133800 |
| H  | -3.25138200 | -3.30714500 | -2.25065300 |
| C  | -4.57147900 | -0.76420700 | 0.35674600  |
| H  | -2.51190000 | -0.43212700 | 0.87461800  |
| C  | -5.46234700 | -1.46039900 | -0.45753500 |
| H  | -5.67387400 | -2.91954800 | -2.02860000 |
| H  | -4.94332200 | -0.05606400 | 1.09401100  |
| H  | -6.53278000 | -1.29330500 | -0.36048000 |
| N  | -0.43842200 | -1.14982900 | -0.57617000 |
| H  | -0.83047400 | -3.32547600 | -2.53324000 |
| Mn | -0.27009400 | 0.87389500  | 0.09838000  |
| O  | -1.73320900 | 1.71699700  | -1.15772300 |
| O  | 1.25649600  | 0.14249400  | 1.41998700  |
| O  | -1.25526500 | 1.39017100  | 1.89514600  |
| O  | 0.91836900  | 2.52223300  | -0.47190100 |
| C  | -1.90448800 | 2.97878100  | -1.23668400 |
| C  | 0.42407000  | 3.68122000  | -0.66953700 |
| C  | -0.92114700 | 3.94771000  | -0.97855300 |
| H  | -1.20349700 | 4.98912500  | -1.11062500 |
| C  | -3.26644400 | 3.42672300  | -1.67569000 |
| H  | -3.46239200 | 3.04885800  | -2.68694800 |
| H  | -3.38163600 | 4.51393600  | -1.67466000 |
| H  | -4.02213900 | 2.98020900  | -1.01776400 |
| C  | 1.38477700  | 4.82880200  | -0.57652900 |
| H  | 0.90686900  | 5.80068100  | -0.72536700 |
| H  | 2.17397900  | 4.70080400  | -1.32803000 |
| H  | 1.87533000  | 4.81319500  | 0.40412000  |
| C  | -1.20902500 | 0.66730900  | 2.94709800  |
| C  | 0.96374100  | -0.47664400 | 2.49111600  |
| C  | -0.20541800 | -0.26567600 | 3.24779100  |
| H  | -0.30928500 | -0.82892200 | 4.17206000  |
| C  | 1.93992700  | -1.51888800 | 2.94980300  |
| H  | 1.82550600  | -2.40461800 | 2.30817000  |
| H  | 1.78518800  | -1.82363900 | 3.98882100  |
| H  | 2.96676500  | -1.15888000 | 2.81620400  |
| C  | -2.34456000 | 0.84479800  | 3.91063600  |
| H  | -2.24045900 | 0.24002000  | 4.81555600  |
| H  | -3.28498300 | 0.57918800  | 3.40986500  |
| H  | -2.42292000 | 1.90229300  | 4.19054500  |

|    |             |             |             |
|----|-------------|-------------|-------------|
| O  | 1.27811500  | 2.02601500  | 2.61438700  |
| C  | 1.35805900  | 0.78635300  | 2.70125900  |
| C  | -0.81801800 | 0.65436400  | 4.03817100  |
| C  | 0.44802800  | 0.05581000  | 3.55328800  |
| H  | -0.93796800 | 0.48602800  | 5.11616900  |
| H  | 0.63139500  | -0.99653500 | 3.76945200  |
| H  | -0.83965800 | 1.58887900  | 1.74433200  |
| C  | 2.35314200  | 0.04215700  | 1.88703500  |
| C  | 3.39203400  | 0.75988200  | 1.28172900  |
| C  | 2.24418700  | -1.33546200 | 1.64998400  |
| C  | 4.32120900  | 0.11077300  | 0.48013300  |
| H  | 3.46394200  | 1.83074900  | 1.45829500  |
| C  | 3.17226200  | -1.98194500 | 0.84196900  |
| H  | 1.42061700  | -1.90813400 | 2.07514500  |
| C  | 4.21427500  | -1.26221000 | 0.26202300  |
| H  | 5.13183800  | 0.67419300  | 0.02305600  |
| H  | 3.07483000  | -3.04939200 | 0.65415900  |
| H  | 4.93965300  | -1.77133100 | -0.37000900 |
| H  | -0.81407800 | 1.73850600  | 3.87713000  |
| C  | -2.00770900 | -0.01361700 | 3.32840700  |
| H  | -2.94654900 | 0.48752500  | 3.60557000  |
| C  | -1.90572900 | -0.01758300 | 1.82759500  |
| C  | -2.59324200 | -1.08051300 | 1.06551100  |
| C  | -2.55717400 | -2.41646200 | 1.47740400  |
| C  | -3.21708200 | -0.75172400 | -0.14481500 |
| C  | -3.11040700 | -3.40912500 | 0.67537600  |
| H  | -2.05541000 | -2.69245700 | 2.40338300  |
| C  | -3.78512900 | -1.74256600 | -0.93443600 |
| H  | -3.25529800 | 0.29097900  | -0.45558700 |
| C  | -3.72474300 | -3.07496200 | -0.52899900 |
| H  | -3.05752900 | -4.44892700 | 0.99033500  |
| H  | -4.27556600 | -1.47571400 | -1.86839700 |
| H  | -4.16197900 | -3.85341300 | -1.15063000 |
| N  | -1.24551600 | 0.85909000  | 1.15374600  |
| H  | -2.11358400 | -1.04681400 | 3.68076600  |
| Mn | -0.00865000 | 0.49158600  | -0.70637400 |
| O  | -0.07504100 | -1.61353500 | -0.75666700 |
| O  | 0.54696100  | 2.55038700  | -0.48304100 |
| O  | -1.27759700 | 1.20285100  | -2.25694000 |
| O  | 1.78009200  | 0.22998800  | -1.88368700 |
| C  | 0.60706200  | -2.44148900 | -1.44268300 |
| C  | 2.21796800  | -0.82372200 | -2.44043200 |
| C  | 1.67853200  | -2.11389200 | -2.28469900 |
| H  | 2.17024000  | -2.92891300 | -2.81011300 |

|   |             |             |             |
|---|-------------|-------------|-------------|
| C | 0.22449700  | -3.88418900 | -1.28092800 |
| H | 0.33532700  | -4.16335800 | -0.22390700 |
| H | 0.82549800  | -4.56150600 | -1.89411200 |
| H | -0.83639800 | -4.01418400 | -1.53116500 |
| C | 3.42447400  | -0.65236800 | -3.31847500 |
| H | 3.79329200  | -1.59458900 | -3.73343200 |
| H | 4.22582500  | -0.17454500 | -2.74049200 |
| H | 3.18012300  | 0.02947500  | -4.14242300 |
| C | -1.86693900 | 2.33205300  | -2.20010200 |
| C | -0.31399900 | 3.47914200  | -0.60287300 |
| C | -1.47748900 | 3.41556600  | -1.39328500 |
| H | -2.09542500 | 4.30938700  | -1.43408100 |
| C | -0.03409200 | 4.73575800  | 0.16862000  |
| H | 0.03401100  | 4.48431600  | 1.23545700  |
| H | -0.79480100 | 5.50886400  | 0.02939000  |
| H | 0.94425900  | 5.13535600  | -0.12483700 |
| C | -3.06985000 | 2.48712600  | -3.08396200 |
| H | -3.57285800 | 3.45039500  | -2.96310000 |
| H | -3.78079400 | 1.67752400  | -2.87497300 |
| H | -2.76310700 | 2.37578800  | -4.13157200 |
